# Supplementary material for: Molecular Phylogeography of a Human Autosomal Skin Color Locus Under Natural Selection
Source: PubMed Central journal article supplement (PMC3815065; doi:10.1534/g3.113.007484), 2013-11-01
Supplement: supp_g3.113.007484_007484SI.pdf [file supp_g3.113.007484_007484SI.pdf]

## **Molecular phylogeography of a human autosomal skin color locus under natural selection**

Victor A. Canfield<sup>\*</sup>, Arthur Berg<sup>§,†</sup>, Steven Peckins<sup>‡,\*\*</sup>, Steven M. Wentzel<sup>‡,\*\*</sup>,  
Khai Chung Ang<sup>‡,\*\*</sup>, Stephen Oppenheimer<sup>§§</sup> and Keith C. Cheng<sup>\*,§,\*\*</sup>

<sup>\*</sup> Department of Pharmacology, Penn State College of Medicine, Hershey, PA 17033

<sup>§</sup> Penn State Cancer Institute, Penn State College of Medicine, Hershey, PA 17033

<sup>†</sup> Department of Public Health Sciences, Penn State College of Medicine, Hershey, PA 17033

<sup>‡</sup> Jake Gittlen Cancer Research Foundation, Penn State College of Medicine, Hershey, PA 17033

<sup>\*\*</sup> Division of Experimental Pathology, Penn State College of Medicine, Hershey, PA 17033

<sup>§§</sup> School of Anthropology and Museum Ethnography, Oxford University, Oxford, OX2 6PE, UK

**DOI: 10.1534/g3.113.007484**

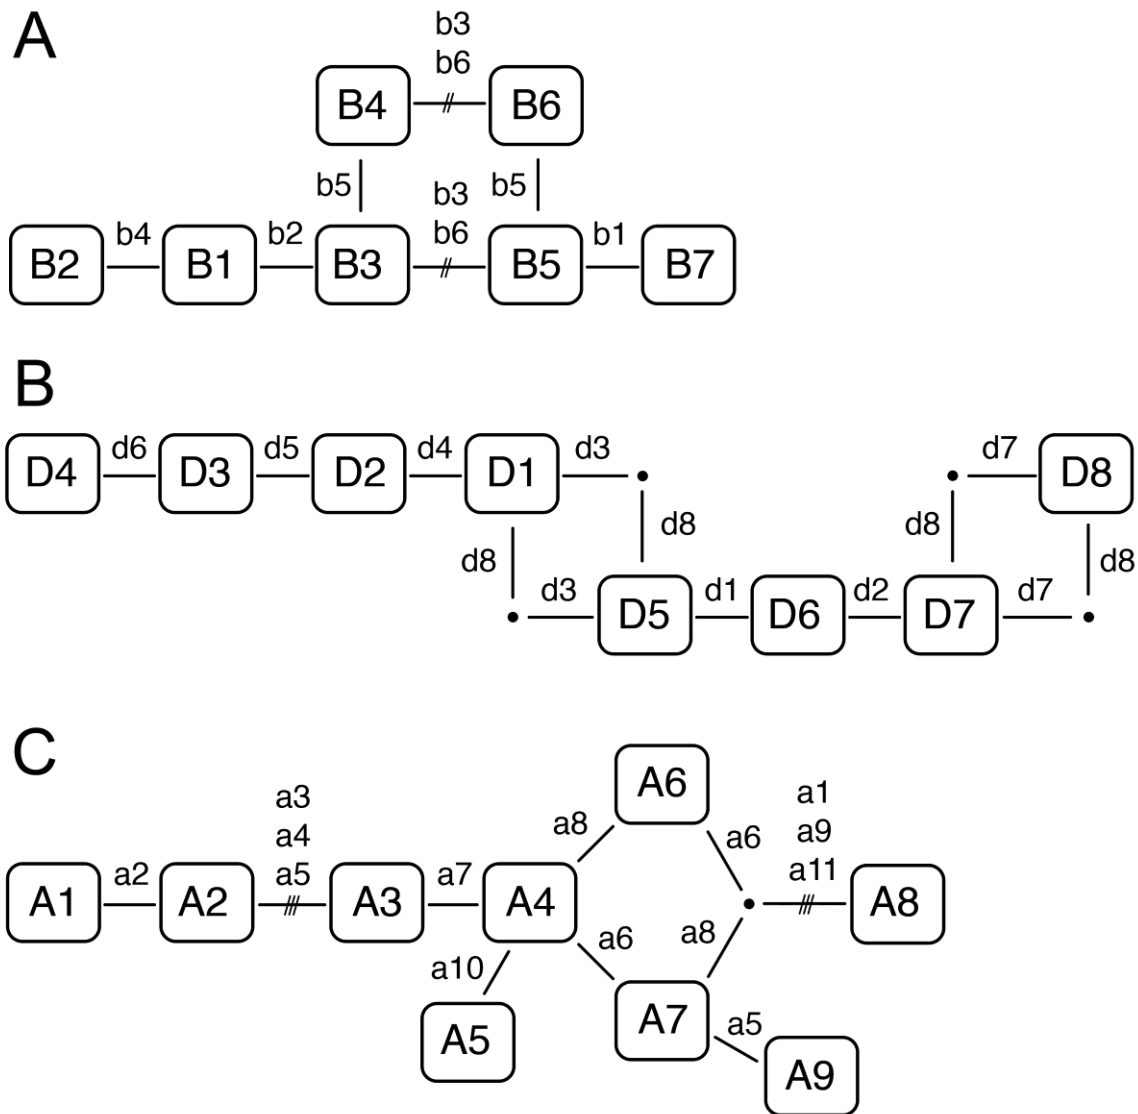

**Figure S1 Common local haplotypes in regions outside core region**

**(A)** Diagram showing haplotypes in B-subregion, defined using 6 SNPs.

**(B)** Haplotypes in D-subregion, defined using 8 SNPs.

**(C)** Haplotypes in A-subregion, defined using 11 SNPs.

The SNPs contributing to these haplotypes are identified in Table S2. Haplotypes carrying ancestral alleles of indicated SNPs are B1, D1, and A9. Full descriptions of haplotypes are in Tables S8-S13.

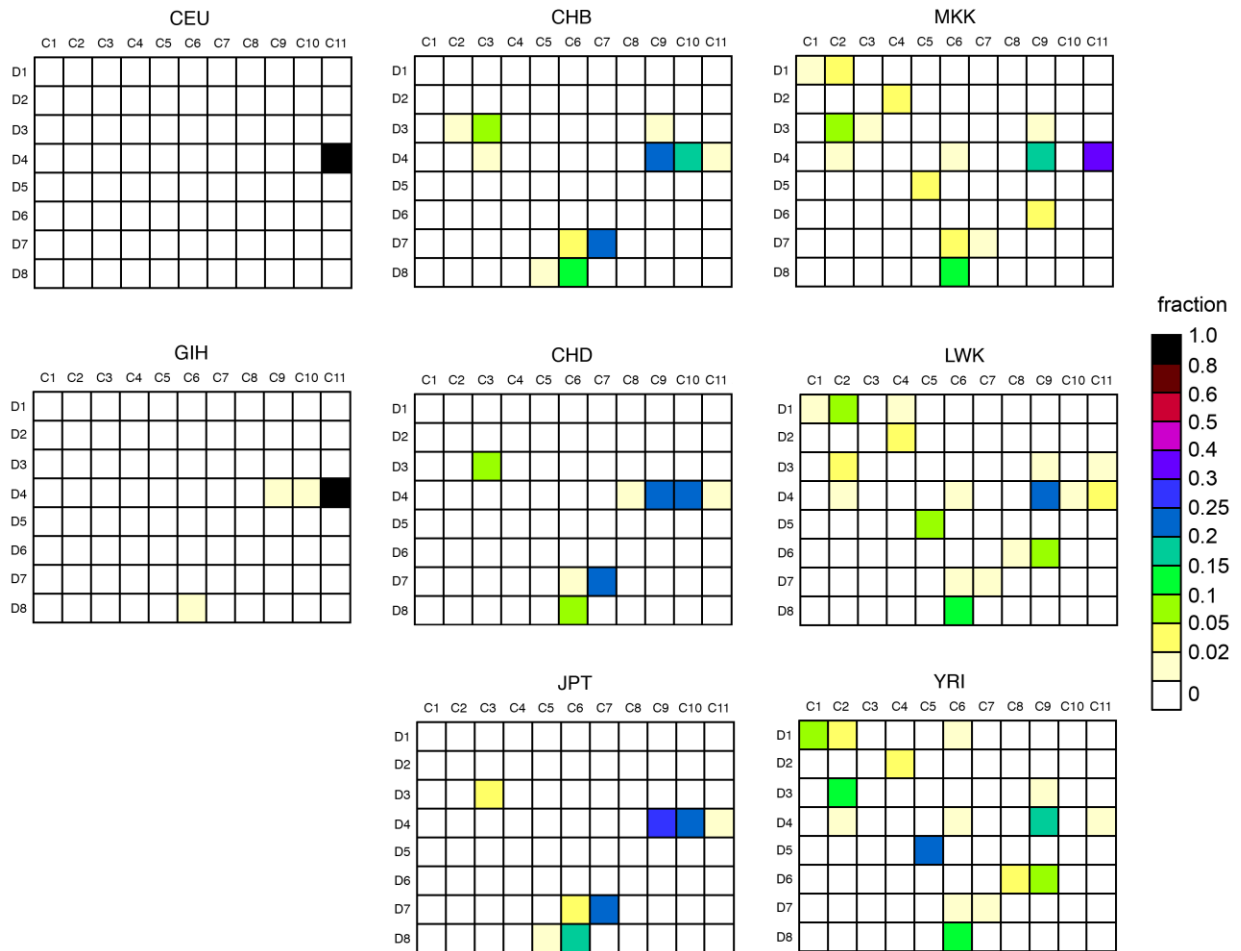

**Figure S2 Relationships between local haplotypes in C and D subregions**

For each HapMap population, distribution of combinations is shown as heat map (scale at right). Only common haplotypes are shown. Association of C5, C6, C7 and some African instances of C9 with D5-D8, while most members of the C9, C10, and C11 clusters associate with D4, indicates that a crossover between the C- and D-regions occurred in a chromosome that was ancestral to C10 and C11. Recurrent recombination between the core (C) region and D-region is apparent, as is the predominant association of C9, C10, and C11 with D4. Counts are shown in File S2.

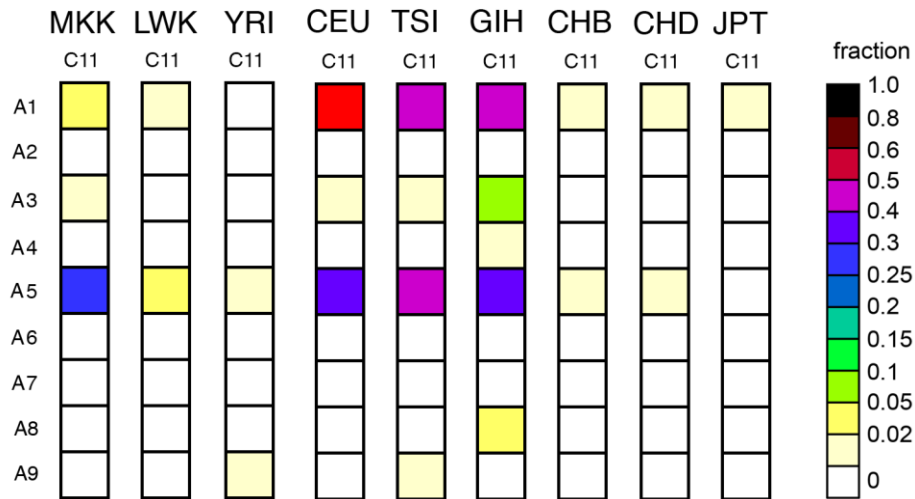

**Figure S3 Association of A-region haplotypes with core haplotype C11**

Scale (heat map, right) is relative to the total sample in each population, as in Figures 4 and S3. A1 and A5 are most commonly associated with C11. Counts are shown in File S3.

## A Recombination first

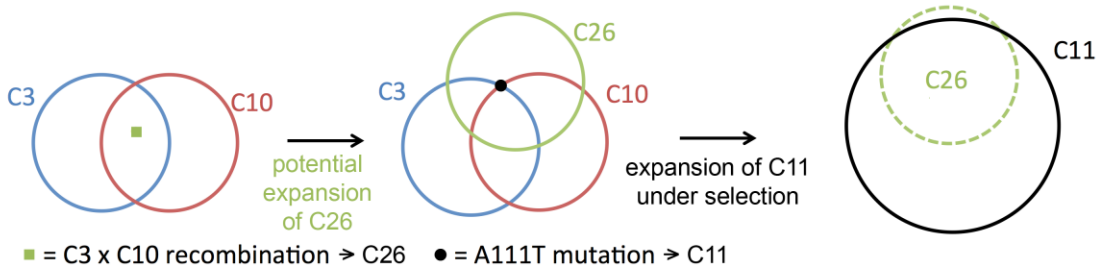

## B Mutation first

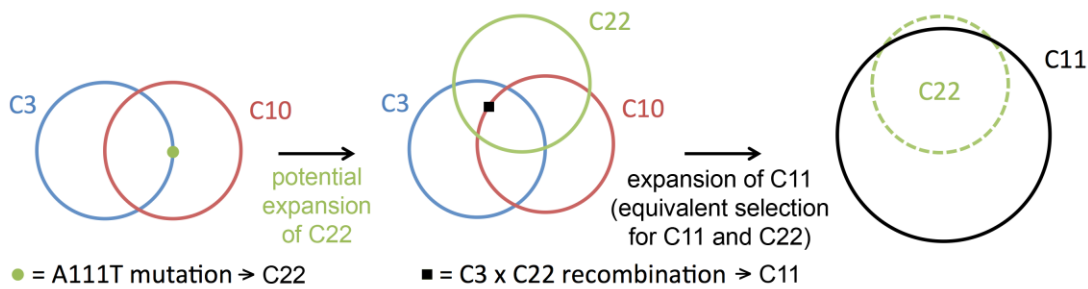

**Figure S4 Evolutionary history of the C11 haplotype**

Circles represent populations or geographical regions in which various haplotypes are found at successive time intervals. Dots indicate locations of events that created new haplotypes; dots on boundaries represent events that could have occurred in any of the adjoining regions. Diagrams show all potential patterns of co-occurrence, but are not intended to imply that all existed. Geographical regions at different time points may differ as a result of migration, selection, or genetic drift. **A.** Recombination first model. First diagram shows C3 and C10 with overlapping distributions. The green dot indicates recombination between C3 and C10 within their region of overlap to produce haplotype C26, a C11 precursor lacking the *A111T* mutation. At a subsequent time (second diagram), potential expansion of the range of C26 is shown. Creation of C11 by mutation in C26 at *A111T* (black dot) is independent of the distributions of C3 and C10. The third diagram represents the present. C11 expansion as a result of positive selection results in replacement of C26 within the region of fixation. C26 may potentially still exist outside the region in which C11 is fixed. **B.** Mutation first model. First diagram shows C3 and C10. Creation of C22 from C10 by the mutation *A111T* (green dot) is independent of the distribution of C3. At a subsequent time (second diagram), potential expansion or migration of C22 is shown. Recombination between C3 and C22 to produce C11 (black dot) is then independent of C10. The third diagram represents the present. C11 has expanded, while C22 has been reduced to a minor component. Since both haplotypes carry the *A111T* mutation

that is the target of selection, replacement in this model occurs via genetic drift or as a result of a small selective advantage (of unknown origin) of C11 over C22.

A

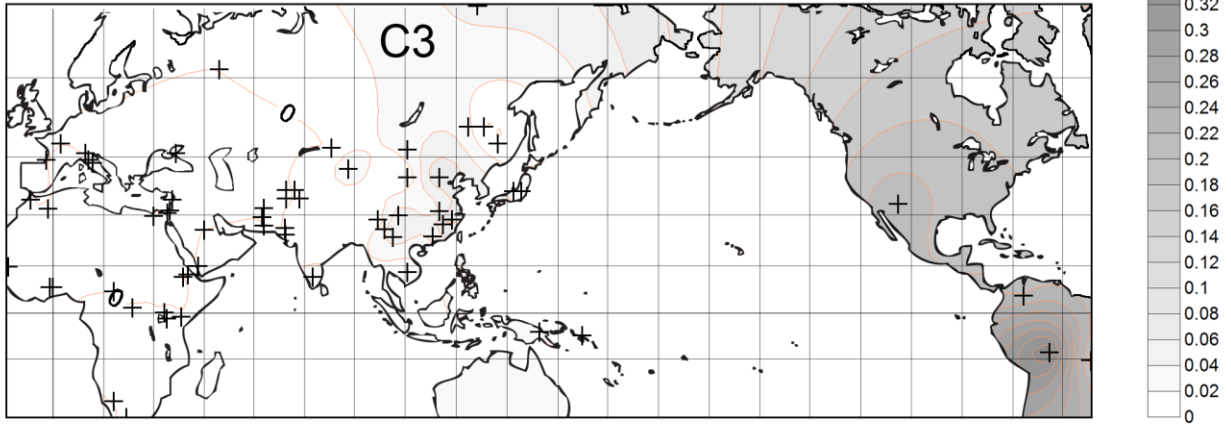

B

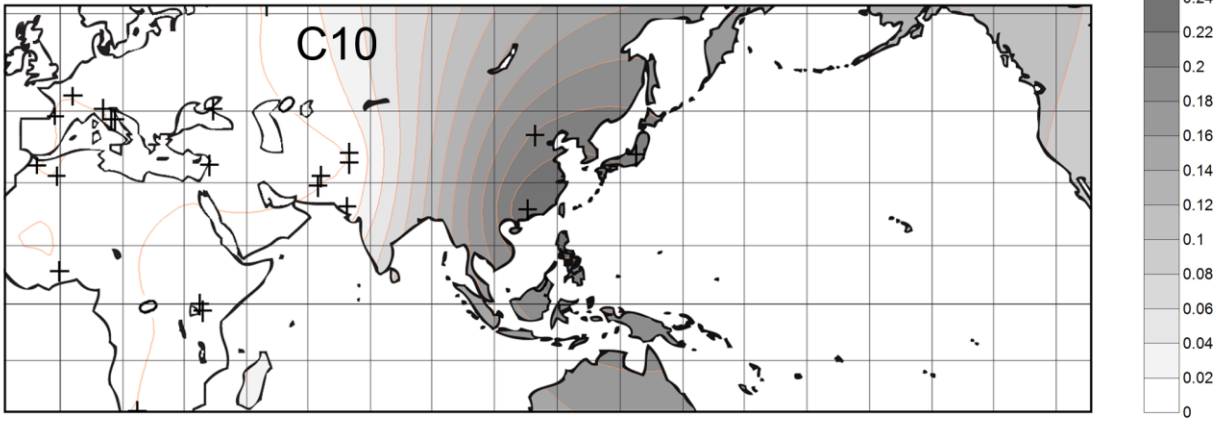

**Figure S5 World distributions of haplotype C3 and C10**

**(A)** Contour plot showing frequencies of haplotype C3

**(B)** Plot of frequency of haplotype C10

Scales are at right of each panel. Sampled populations are indicated (+).

**Table S1** *A1117* frequencies used to plot world distribution

| <b>population name or code</b> | <b>sample size<br/>(2N)</b> | <b><i>A1117</i><br/>frequency</b> | <b>reference</b> |
|--------------------------------|-----------------------------|-----------------------------------|------------------|
| Hezhen                         | 18                          | 0.000                             | A                |
| Pima, Mexico                   | 106                         | 0.000                             | B                |
| Koreans                        | 106                         | 0.000                             | B                |
| Ticuna                         | 130                         | 0.046                             | B                |
| Ami                            | 80                          | 0.000                             | B                |
| Mbuti                          | 78                          | 0.000                             | B                |
| Han                            | 116                         | 0.017                             | B                |
| Japanese                       | 98                          | 0.020                             | B                |
| Melanesian, Nasioi             | 46                          | 0.000                             | B                |
| Atayal                         | 84                          | 0.000                             | B                |
| Karitiana                      | 106                         | 0.000                             | B                |
| Micronesians                   | 74                          | 0.068                             | B                |
| Bantu Kenya                    | 24                          | 0.000                             | A                |
| Tujia                          | 20                          | 0.000                             | A                |
| Yizu                           | 20                          | 0.000                             | A                |
| Miaozu                         | 20                          | 0.000                             | A                |
| Dai                            | 20                          | 0.000                             | A                |
| Lahu                           | 20                          | 0.000                             | A                |
| She                            | 20                          | 0.000                             | A                |
| Naxi                           | 20                          | 0.000                             | A                |
| Papuan                         | 34                          | 0.000                             | A                |
| Orcadian                       | 32                          | 1.000                             | A                |
| Columbian                      | 26                          | 0.000                             | A                |
| Belorussian                    | 18                          | 0.944                             | C                |
| Lithuanians                    | 20                          | 1.000                             | C                |
| Biaka                          | 138                         | 0.007                             | B                |
| Pima, Arizona                  | 100                         | 0.010                             | B                |
| Danes                          | 102                         | 0.980                             | B                |
| Surui                          | 90                          | 0.033                             | B                |
| Hungarian                      | 178                         | 0.978                             | B                |
| Japanese, JPT                  | 172                         | 0.012                             | D                |
| Hakka                          | 80                          | 0.013                             | B                |
| Yoruba                         | 154                         | 0.013                             | B                |
| Yoruba, YRI                    | 226                         | 0.013                             | D                |
| Irish                          | 230                         | 1.000                             | B                |
| Finns                          | 72                          | 0.931                             | B                |
| Maya, Yucatan                  | 94                          | 0.128                             | B                |
| European Americans, CEU        | 116                         | 1.000                             | D                |
| Cheyenne                       | 112                         | 0.045                             | B                |
| Han, CHB                       | 168                         | 0.030                             | D                |
| Han                            | 98                          | 0.020                             | B                |
| Lao Loum                       | 238                         | 0.034                             | B                |
| Northern Italian               | 28                          | 1.000                             | A                |

continued



**Table S1 (continued)**

| <b>population name or code</b> | <b>sample size<br/>(2N)</b> | <b>A111T<br/>frequency</b> | <b>reference</b> |
|--------------------------------|-----------------------------|----------------------------|------------------|
| Ibo                            | 96                          | 0.042                      | B                |
| Komi-Zyrian                    | 92                          | 0.913                      | B                |
| Russians                       | 66                          | 1.000                      | B                |
| Yakut                          | 102                         | 0.206                      | B                |
| Mongola                        | 20                          | 0.150                      | A                |
| Tu                             | 20                          | 0.050                      | A                |
| Georgians                      | 40                          | 1.000                      | C                |
| Europeans, Mixed               | 182                         | 0.989                      | B                |
| Russians                       | 96                          | 1.000                      | B                |
| Bantu Southern                 | 16                          | 0.060                      | A                |
| French Basque                  | 48                          | 1.000                      | A                |
| Tuscan                         | 16                          | 1.000                      | A                |
| Spaniards                      | 115                         | 0.987                      | B                |
| African Americans              | 178                         | 0.236                      | B                |
| San                            | 14                          | 0.070                      | A                |
| Chuvash                        | 84                          | 0.929                      | B                |
| Hungarians                     | 40                          | 1.000                      | C                |
| Cambodians, Khmer              | 50                          | 0.080                      | B                |
| Quechua                        | 46                          | 0.152                      | B                |
| Zaramo                         | 80                          | 0.088                      | B                |
| French                         | 58                          | 1.000                      | A                |
| Romanians                      | 32                          | 0.938                      | C                |
| Daur                           | 20                          | 0.100                      | A                |
| Hausa                          | 78                          | 0.115                      | B                |
| Chuvash                        | 34                          | 0.971                      | C                |
| Sandawe                        | 76                          | 0.118                      | B                |
| Khanty                         | 98                          | 0.806                      | B                |
| Orogen                         | 20                          | 0.150                      | A                |
| Mandenka                       | 48                          | 0.160                      | E                |
| Adygei                         | 108                         | 0.982                      | B                |
| Xibo                           | 18                          | 0.190                      | A                |
| Uzbeks                         | 30                          | 0.600                      | C                |
| Uygur                          | 20                          | 0.500                      | A                |
| Spaniards                      | 24                          | 1.000                      | C                |
| Chagga                         | 90                          | 0.267                      | B                |
| Masai                          | 40                          | 0.275                      | B                |
| Tamil                          | 116                         | 0.293                      | F                |
| Lezgins                        | 36                          | 1.000                      | C                |
| Armenians                      | 38                          | 1.000                      | C                |
| Sardinian                      | 56                          | 0.980                      | A                |
| Adygei                         | 34                          | 1.000                      | A                |
| Cypriots                       | 24                          | 1.000                      | C                |
| Turks                          | 38                          | 0.895                      | C                |
| Syrians                        | 32                          | 1.000                      | C                |
| Palestinian                    | 102                         | 0.990                      | A                |

continued

**Table S1 (continued)**

| <b>population name or code</b> | <b>sample size<br/>(2N)</b> | <b>A111T<br/>frequency</b> | <b>reference</b> |
|--------------------------------|-----------------------------|----------------------------|------------------|
| Algerian                       | 68                          | 0.912                      | B                |
| Kalash                         | 50                          | 1.000                      | A                |
| Ethiopian Jewish               | 26                          | 0.460                      | C                |
| Lebanese                       | 14                          | 1.000                      | C                |
| South Indian                   | 38                          | 0.470                      | C                |
| Mozabite                       | 60                          | 0.870                      | A                |
| Sinhalese                      | 108                         | 0.500                      | F                |
| Druze                          | 204                         | 1.000                      | B                |
| Jordanians                     | 40                          | 1.000                      | C                |
| Hazara                         | 48                          | 0.610                      | A                |
| Ethiopian                      | 38                          | 0.550                      | C                |
| Jews, Ethiopian                | 64                          | 0.578                      | B                |
| Moroccans                      | 96                          | 0.979                      | B                |
| Tunisian                       | 194                         | 0.923                      | B                |
| Moroccan                       | 20                          | 0.900                      | C                |
| Samaritans                     | 78                          | 1.000                      | B                |
| Burusho                        | 50                          | 0.980                      | A                |
| Libya                          | 62                          | 0.919                      | B                |
| Egypt                          | 24                          | 0.880                      | C                |
| Yemen                          | 20                          | 0.650                      | C                |
| Iranians                       | 40                          | 0.925                      | C                |
| Pathan (Pashtun)               | 48                          | 0.960                      | A                |
| Sindhi                         | 50                          | 0.830                      | A                |
| Keralite                       | 60                          | 0.733                      | B                |
| Bedouin                        | 96                          | 0.970                      | A                |
| Brahui                         | 50                          | 1.000                      | A                |
| Makrani                        | 50                          | 0.920                      | A                |
| Balochi                        | 50                          | 0.980                      | A                |
| Saudi                          | 40                          | 0.950                      | C                |
| Maasai, MKK                    | 286                         | 0.329                      | D                |
| Luhya, LWK                     | 180                         | 0.067                      | D                |
| India, AA-C-IP5                | 36                          | 0.110                      | G                |
| India, AA-E-IP3                | 44                          | 0.210                      | G                |
| India, DR-C-IP2                | 40                          | 0.020                      | G                |
| India, DR-S-IP4                | 42                          | 0.560                      | G                |
| India, DR-S-LP2                | 44                          | 0.440                      | G                |
| India, DR-S-LP3                | 38                          | 0.390                      | G                |
| India, IE-E-IP1                | 44                          | 0.270                      | G                |
| India, IE-E-LP2                | 46                          | 0.660                      | G                |
| India, IE-E-LP4                | 44                          | 0.610                      | G                |
| India, IE-N-IP2                | 46                          | 0.280                      | G                |
| India, IE-N-LP1                | 42                          | 0.630                      | G                |
| India, IE-N-LP5                | 46                          | 0.710                      | G                |
| India, IE-N-LP9                | 46                          | 0.560                      | G                |
| India, IE-N-SP4                | 46                          | 0.610                      | G                |

continued

**Table S1 (concluded)**

| population name or code | sample size<br>(2N) | A111T<br>frequency | reference |
|-------------------------|---------------------|--------------------|-----------|
| India, IE-NE-IP1        | 44                  | 0.260              | G         |
| India, IE-NE-LP1        | 44                  | 0.480              | G         |
| India, IE-W-LP1         | 42                  | 0.610              | G         |
| India, IE-W-LP2         | 42                  | 0.600              | G         |
| India, IE-W-LP3         | 46                  | 0.590              | G         |
| India, IE-W-LP4         | 44                  | 0.690              | G         |
| India, TB-N-IP1         | 46                  | 0.220              | G         |
| India, TB-N-SP1         | 46                  | 0.360              | G         |
| India, TB-NE-LP1        | 44                  | 0.220              | G         |

## References:

A, NORTON et al. 2007

B, CHEUNG et al. 2000, [alfred.med.yale.edu/alfred/](http://alfred.med.yale.edu/alfred/)

C, BEHAR et al. 2010

D, ALTSHULER et al. 2010, <http://hapmap.ncbi.nlm.nih.gov/>E, <http://www.cephb.fr/en/cephdb/>

F, SOEJIMA and KODA 2007

G, INDIAN GENOME VARIATION CONSORTIUM 2008, <http://igvdb.res.in>

**Table S2 HapMap SNPs used for analysis**

| <b>A region</b>        |               |                     |                    |              |
|------------------------|---------------|---------------------|--------------------|--------------|
| <b>nickname</b>        | <b>SNP_ID</b> | <b>position (a)</b> | <b>alleles (b)</b> | <b>notes</b> |
| a1                     | rs16960508    | 46108528            | C/T                | (e)          |
| a2                     | rs1869453     | 46111620            | G/A                | (e)          |
| a3                     | rs1426656     | 46114468            | A/C                |              |
| a4                     | rs17340116    | 46114858            | A/G                |              |
| a5                     | rs1453857     | 46116200            | C/T                | (e)          |
| a6                     | rs2469594     | 46121836            | G/T                |              |
|                        | rs2470104     | 46122159            | T/C                | (e)          |
| a7                     | rs1025199     | 46126798            | C/A                |              |
| a8                     | rs1365453     | 46129898            | A/C                |              |
| a9                     | rs991877      | 46137615            | T/C                | (e)          |
| a10                    | rs2433363     | 46139544            | G/A                | (e)          |
| a11                    | rs16960535    | 46147951            | T/C                |              |
| <b>B region</b>        |               |                     |                    |              |
| <b>nickname</b>        | <b>SNP_ID</b> | <b>position</b>     | <b>alleles</b>     | <b>notes</b> |
| b1                     | rs16960541    | 46157395            | G/T                |              |
| b2                     | rs2433360     | 46161326            | A/C                |              |
| b3                     | rs2459392     | 46163796            | G/A                |              |
|                        | rs10519163    | 46164805            | C/T                | (e)          |
| b4                     | rs7180657     | 46168230            | T/C                | (e)          |
|                        | rs2459383     | 46171162            | G/A                | (e)          |
| b5                     | rs2250072     | 46172199            | G/A                | (e)          |
| b6                     | rs2459385     | 46174380            | C/A                | (e)          |
| <b>C (core) region</b> |               |                     |                    |              |
| <b>nickname</b>        | <b>SNP_ID</b> | <b>position</b>     | <b>alleles</b>     | <b>notes</b> |
|                        | rs12440301    | 46177216            | G/A                | (e)          |
|                        | rs12441154    | 46178248            | C/T                | (f)          |
| c1                     | rs1834640     | 46179457            | G/A                | (c, e)       |
|                        | rs1559857     | 46184100            | A/G                | (e)          |
| c2                     | rs2675345     | 46187491            | G/A                | (f)          |
| c3                     | rs2469592     | 46189167            | G/A                | (e)          |
| c4                     | rs2470101     | 46191159            | C/T                | (e)          |
| c5                     | rs938505      | 46193187            | C/T                | (e)          |
| c6                     | rs2433354     | 46202261            | T/C                | (e)          |
| c7                     | rs2459391     | 46202360            | G/A                | (f)          |
| c8                     | rs2433356     | 46203652            | A/G                | (e)          |
|                        | rs16960620    | 46204191            | A/G                | (f, h)       |
| c9                     | rs2675347     | 46205937            | G/A                | (e, g)       |
|                        | rs2555364     | 46206678            | C/G                | (f, h)       |

continued

**Table 2 (concluded)**

| c10             | rs2675348  | 46208036 | G/A     | (e)       |
|-----------------|------------|----------|---------|-----------|
|                 | rs8040016  | 46212039 | C/T     | (e)       |
|                 | rs16960624 | 46212505 | G/A     | (e)       |
| c11             | rs1426654  | 46213776 | G/A     | (f, h)    |
| c12             | rs2470102  | 46220786 | G/A     | (f)       |
| c13             | rs16960631 | 46226209 | A/G     | (c, d, f) |
| c14             | rs2675349  | 46232679 | G/A     | (f)       |
|                 | rs3736482  | 46237809 | T/C     | (e)       |
|                 | rs9652449  | 46240091 | T/G     | (e)       |
| c15             | rs3817315  | 46248438 | T/C     | (f)       |
| c16             | rs7163587  | 46255311 | T/C     | (f)       |
| <b>D region</b> |            |          |         |           |
| nickname        | SNP_ID     | position | alleles | notes     |
| d1              | rs2413886  | 46265512 | T/G     | (c, e)    |
| d2              | rs34722053 | 46268957 | C/T     | (c)       |
| d3              | rs8037482  | 46275588 | A/G     | (c, e)    |
| d4              | rs7170260  | 46288372 | G/T     | (c)       |
| d5              | rs1878186  | 46295692 | C/T     | (c, e)    |
| d6              | rs9920281  | 46301601 | G/A     | (e)       |
| d7              | rs8032941  | 46302144 | T/C     | (c)       |
| d8              | rs16960679 | 46304763 | G/A     | (c, d)    |

SNPs given nicknames (named SNPs) were genotyped and phased in all 11 HapMap phase 3 populations (release 27), except as otherwise noted. SNPs genotyped in HapMap phase 2 (release 21) are omitted here unless cited elsewhere.

**Footnotes:**

- (a) NCBI B36 coordinates; for B37, add 2212708
- (b) ancestral allele first
- (c) named SNPs absent from TSI
- (d) named SNPs absent from MEX
- (e) present in HGDP
- (f) core-region SNP absent from HGDP data
- (g) absent from HapMap phase 2 release 21
- (h) genotyped in GIARDINA *et al.* (2008)

**Table S3 Description of core haplotypes determined using 16 SNPs**

| haplotype     |      | SNP |    |    |    |    |    |    |    |    |     |     |     |     |     |     |     |
|---------------|------|-----|----|----|----|----|----|----|----|----|-----|-----|-----|-----|-----|-----|-----|
| number<br>(a) | name | c1  | c2 | c3 | c4 | c5 | c6 | c7 | c8 | c9 | c10 | c11 | c12 | c13 | c14 | c15 | c16 |
| 18            | C1   | G   | G  | G  | C  | C  | T  | G  | A  | G  | G   | G   | G   | A   | G   | T   | T   |
| 16            | C2   | G   | G  | G  | C  | T  | T  | G  | A  | G  | G   | G   | G   | A   | G   | T   | T   |
| 17            | C3   | A   | G  | G  | C  | T  | T  | G  | A  | G  | G   | G   | G   | A   | G   | T   | T   |
| 20            | C4   | G   | G  | G  | T  | C  | T  | G  | A  | G  | G   | G   | G   | A   | G   | T   | T   |
| 19            | C5   | G   | G  | A  | T  | C  | T  | A  | A  | G  | G   | G   | G   | A   | G   | T   | C   |
| 12            | C6   | G   | G  | A  | T  | C  | T  | A  | G  | G  | G   | G   | G   | A   | G   | T   | C   |
| 22            | C7   | G   | G  | A  | T  | C  | T  | A  | G  | G  | G   | G   | G   | G   | G   | T   | C   |
| 28            | C8   | G   | G  | A  | T  | C  | C  | A  | G  | A  | G   | G   | G   | A   | A   | C   | C   |
| 8             | C9   | G   | G  | A  | T  | C  | C  | A  | G  | A  | A   | G   | G   | A   | A   | C   | C   |
| 13            | C10  | G   | A  | A  | T  | C  | C  | A  | G  | A  | A   | G   | A   | A   | A   | C   | C   |
| 1             | C11  | A   | A  | A  | T  | C  | C  | A  | G  | A  | A   | A   | A   | A   | A   | C   | C   |
| 2             | C25  | A   | A  | A  | T  | T  | C  | A  | A  | A  | A   | A   | A   | A   | A   | C   | C   |
| 3             | C24  | A   | A  | A  | T  | C  | C  | A  | A  | A  | A   | A   | A   | A   | A   | C   | C   |
| 4             | C23  | A   | A  | A  | T  | C  | C  | A  | G  | A  | A   | A   | A   | A   | A   | T   | C   |
| 5             | (b)  | A   | A  | A  | T  | T  | C  | G  | A  | G  | A   | A   | G   | A   | G   | C   | C   |
| 7             |      | A   | G  | A  | T  | C  | C  | A  | G  | A  | A   | A   | A   | A   | A   | C   | C   |
| 9             |      | G   | G  | A  | T  | C  | C  | A  | G  | A  | A   | A   | A   | A   | A   | C   | C   |
| 10            | (b)  | A   | A  | A  | T  | C  | C  | A  | G  | A  | A   | A   | A   | A   | G   | T   | C   |
| 15            | (b)  | A   | G  | G  | C  | T  | C  | G  | A  | A  | A   | A   | A   | A   | A   | C   | C   |
| 25            | C22  | G   | A  | A  | T  | C  | C  | A  | G  | A  | A   | A   | A   | A   | A   | C   | C   |
| 37            |      | G   | G  | A  | T  | C  | T  | A  | A  | G  | G   | A   | G   | A   | G   | T   | C   |
| 41            |      | A   | G  | G  | C  | T  | T  | G  | A  | G  | G   | A   | G   | A   | G   | T   | T   |
| 46            |      | G   | A  | A  | T  | C  | C  | A  | G  | A  | A   | A   | A   | A   | A   | T   | C   |
| 6             | (b)  | A   | G  | G  | C  | C  | T  | A  | G  | A  | G   | G   | A   | A   | A   | T   | T   |
| 11            | (b)  | G   | G  | A  | T  | C  | T  | A  | G  | G  | G   | G   | G   | G   | A   | C   | C   |
| 14            | (b)  | G   | A  | A  | T  | C  | T  | A  | G  | G  | G   | G   | G   | A   | G   | T   | T   |
| 21            | C20  | G   | G  | A  | T  | C  | C  | A  | G  | A  | A   | G   | G   | A   | G   | T   | C   |
| 23            | C12  | G   | G  | G  | C  | T  | T  | G  | A  | G  | G   | G   | G   | A   | G   | T   | C   |
| 24            |      | G   | G  | G  | C  | C  | T  | G  | A  | A  | G   | G   | G   | A   | G   | T   | T   |
| 26            | C17  | G   | G  | A  | T  | C  | T  | G  | G  | G  | G   | G   | G   | A   | G   | T   | C   |
| 27            | C15  | G   | G  | A  | T  | C  | T  | G  | A  | G  | G   | G   | G   | A   | G   | T   | T   |
| 29            | C16  | G   | G  | A  | T  | C  | T  | G  | A  | G  | G   | G   | G   | A   | G   | T   | C   |
| 30            | C13  | G   | G  | G  | C  | T  | T  | G  | G  | G  | G   | G   | G   | A   | G   | T   | T   |
| 31            |      | G   | G  | A  | T  | T  | C  | A  | G  | A  | G   | G   | G   | A   | A   | C   | C   |
| 32            |      | G   | G  | G  | C  | C  | T  | G  | G  | G  | G   | G   | G   | A   | G   | T   | C   |
| 33            | C14  | G   | G  | G  | C  | T  | T  | G  | G  | G  | G   | G   | G   | A   | G   | T   | C   |
| 34            |      | G   | G  | G  | T  | C  | C  | A  | G  | A  | A   | G   | G   | A   | A   | C   | C   |
| 35            |      | G   | G  | A  | T  | C  | T  | A  | G  | A  | G   | G   | G   | A   | G   | T   | C   |
| 36            |      | G   | G  | A  | T  | C  | T  | A  | G  | A  | G   | G   | G   | G   | G   | T   | C   |
| 38            |      | G   | G  | A  | T  | C  | C  | A  | G  | A  | A   | G   | G   | G   | G   | C   | C   |
| 39            | C18  | G   | G  | A  | T  | C  | C  | A  | G  | A  | A   | G   | G   | A   | A   | T   | C   |

continued

Table S3 (concluded)

| haplotype     |      | SNP |    |    |    |    |    |    |    |    |     |     |     |     |     |     |     |
|---------------|------|-----|----|----|----|----|----|----|----|----|-----|-----|-----|-----|-----|-----|-----|
| number<br>(a) | name | c1  | c2 | c3 | c4 | c5 | c6 | c7 | c7 | c9 | c10 | c11 | c12 | c13 | c14 | c15 | c16 |
| 40            |      | G   | G  | A  | T  | C  | T  | A  | A  | G  | A   | G   | G   | A   | G   | T   | C   |
| 42            | C21  | G   | G  | A  | T  | C  | C  | A  | G  | A  | A   | G   | A   | A   | A   | C   | C   |
| 43            |      | G   | G  | A  | T  | C  | C  | A  | G  | A  | G   | G   | G   | A   | G   | C   | T   |
| 44            |      | A   | G  | A  | T  | C  | T  | A  | G  | G  | G   | G   | G   | A   | G   | T   | C   |
| 45            |      | G   | G  | A  | T  | C  | T  | A  | G  | G  | G   | G   | G   | A   | A   | C   | C   |
| 47            |      | G   | A  | A  | T  | C  | C  | A  | G  | A  | A   | G   | G   | G   | A   | T   | C   |
| 48            |      | A   | G  | G  | C  | T  | T  | G  | A  | A  | G   | G   | G   | A   | G   | T   | T   |
| 49            |      | G   | A  | A  | T  | C  | C  | A  | A  | A  | A   | G   | A   | A   | A   | C   | C   |
| 50            | C26  | A   | A  | A  | T  | C  | C  | A  | G  | A  | A   | G   | A   | A   | A   | C   | C   |
| 51            | C19  | G   | G  | A  | T  | C  | C  | A  | G  | A  | A   | G   | G   | A   | G   | C   | C   |
| 52            |      | G   | G  | A  | T  | C  | T  | A  | G  | G  | G   | G   | G   | A   | A   | T   | C   |

**Footnotes:**

(a) Haplotype numbers used only in Tables S3 and S4.

(b) Three misphased pairs are, after correction:

5+6: C11+C2/C3

10+11: C11+C7

14+15: C11+C2

**Table S4 Population distribution of core haplotypes determined using 16 SNPs**

| haplotype  |      |       | population |     |     |     |     |     |     |     |     |     |     |
|------------|------|-------|------------|-----|-----|-----|-----|-----|-----|-----|-----|-----|-----|
| number (a) | name | total | CEU        | TSI | GIH | MKK | YRI | LWK | CHB | CHD | JPT | MEX | ASW |
| 18         | C1   | 25    | 0          | 0   | 0   | 7   | 13  | 4   | 0   | 0   | 0   | 0   | 1   |
| 16         | C2   | 125   | 0          | 0   | 0   | 38  | 38  | 26  | 1   | 0   | 0   | 1   | 21  |
| 17         | C3   | 45    | 0          | 0   | 0   | 3   | 0   | 0   | 14  | 14  | 5   | 9   | 0   |
| 20         | C4   | 30    | 0          | 0   | 0   | 6   | 7   | 14  | 0   | 0   | 0   | 0   | 3   |
| 19         | C5   | 98    | 0          | 0   | 0   | 13  | 50  | 14  | 1   | 0   | 1   | 0   | 19  |
| 12         | C6   | 245   | 0          | 0   | 1   | 52  | 42  | 33  | 34  | 21  | 35  | 7   | 20  |
| 22         | C7   | 122   | 0          | 0   | 0   | 1   | 3   | 2   | 40  | 39  | 36  | 0   | 1   |
| 28         | C8   | 10    | 0          | 0   | 0   | 0   | 5   | 1   | 0   | 1   | 0   | 0   | 3   |
| 8          | C9   | 365   | 0          | 0   | 3   | 65  | 61  | 63  | 36  | 44  | 51  | 15  | 27  |
| 13         | C10  | 123   | 0          | 0   | 1   | 0   | 0   | 1   | 34  | 41  | 37  | 9   | 0   |
| 1          | C11  | 638   | 109        | 172 | 164 | 92  | 3   | 9   | 3   | 3   | 1   | 60  | 22  |
| 2          | C25  | 2     | 2          | 0   | 0   | 0   | 0   | 0   | 0   | 0   | 0   | 0   | 0   |
| 3          | C24  | 3     | 2          | 0   | 0   | 0   | 0   | 1   | 0   | 0   | 0   | 0   | 0   |
| 4          | C23  | 5     | 2          | 1   | 0   | 0   | 0   | 0   | 1   | 0   | 0   | 1   | 0   |
| 5          |      | 1     | 0          | 1   | 0   | 0   | 0   | 0   | 0   | 0   | 0   | 0   | 0   |
| 7          |      | 2     | 0          | 1   | 0   | 0   | 0   | 0   | 0   | 0   | 0   | 1   | 0   |
| 9          |      | 1     | 0          | 0   | 1   | 0   | 0   | 0   | 0   | 0   | 0   | 0   | 0   |
| 10         |      | 2     | 0          | 0   | 2   | 0   | 0   | 0   | 0   | 0   | 0   | 0   | 0   |
| 15         |      | 1     | 0          | 0   | 1   | 0   | 0   | 0   | 0   | 0   | 0   | 0   | 0   |
| 25         | C22  | 4     | 0          | 0   | 0   | 2   | 0   | 1   | 1   | 0   | 0   | 0   | 0   |
| 37         |      | 1     | 0          | 0   | 0   | 0   | 0   | 1   | 0   | 0   | 0   | 0   | 0   |
| 41         |      | 1     | 0          | 0   | 0   | 0   | 0   | 0   | 0   | 1   | 0   | 0   | 0   |
| 46         |      | 1     | 0          | 0   | 0   | 0   | 0   | 0   | 0   | 0   | 1   | 0   | 0   |
| 6          |      | 1     | 0          | 1   | 0   | 0   | 0   | 0   | 0   | 0   | 0   | 0   | 0   |
| 11         |      | 2     | 0          | 0   | 2   | 0   | 0   | 0   | 0   | 0   | 0   | 0   | 0   |
| 14         |      | 1     | 0          | 0   | 1   | 0   | 0   | 0   | 0   | 0   | 0   | 0   | 0   |
| 21         | C20  | 5     | 0          | 0   | 0   | 4   | 1   | 0   | 0   | 0   | 0   | 0   | 0   |
| 23         | C12  | 2     | 0          | 0   | 0   | 2   | 0   | 0   | 0   | 0   | 0   | 0   | 0   |
| 24         |      | 1     | 0          | 0   | 0   | 1   | 0   | 0   | 0   | 0   | 0   | 0   | 0   |
| 26         | C17  | 8     | 0          | 0   | 0   | 0   | 1   | 5   | 0   | 0   | 0   | 0   | 2   |
| 27         | C15  | 4     | 0          | 0   | 0   | 0   | 2   | 0   | 0   | 0   | 0   | 0   | 2   |
| 29         | C16  | 1     | 0          | 0   | 0   | 0   | 1   | 0   | 0   | 0   | 0   | 0   | 0   |
| 30         | C13  | 1     | 0          | 0   | 0   | 0   | 1   | 0   | 0   | 0   | 0   | 0   | 0   |
| 31         |      | 1     | 0          | 0   | 0   | 0   | 1   | 0   | 0   | 0   | 0   | 0   | 0   |
| 32         |      | 1     | 0          | 0   | 0   | 0   | 1   | 0   | 0   | 0   | 0   | 0   | 0   |
| 33         | C14  | 3     | 0          | 0   | 0   | 0   | 0   | 2   | 0   | 0   | 0   | 0   | 1   |
| 34         |      | 1     | 0          | 0   | 0   | 0   | 0   | 1   | 0   | 0   | 0   | 0   | 0   |
| 35         |      | 1     | 0          | 0   | 0   | 0   | 0   | 1   | 0   | 0   | 0   | 0   | 0   |
| 36         |      | 1     | 0          | 0   | 0   | 0   | 0   | 1   | 0   | 0   | 0   | 0   | 0   |
| 38         |      | 2     | 0          | 0   | 0   | 0   | 0   | 0   | 1   | 1   | 0   | 0   | 0   |
| 39         | C18  | 2     | 0          | 0   | 0   | 0   | 0   | 0   | 1   | 0   | 1   | 0   | 0   |

continued



Table S4 (concluded)

| haplotype     |      |             | population |            |            |            |            |            |            |            |            |            |            |
|---------------|------|-------------|------------|------------|------------|------------|------------|------------|------------|------------|------------|------------|------------|
| number<br>(a) | name | total       | CEU        | TSI        | GIH        | MKK        | YRI        | LWK        | CHB        | CHD        | JPT        | MEX        | ASW        |
| 40            |      | 2           | 0          | 0          | 0          | 0          | 0          | 0          | 1          | 1          | 0          | 0          | 0          |
| 42            | C21  | 2           | 0          | 0          | 0          | 0          | 0          | 0          | 0          | 2          | 0          | 0          | 0          |
| 43            |      | 1           | 0          | 0          | 0          | 0          | 0          | 0          | 0          | 1          | 0          | 0          | 0          |
| 44            |      | 1           | 0          | 0          | 0          | 0          | 0          | 0          | 0          | 1          | 0          | 0          | 0          |
| 45            |      | 1           | 0          | 0          | 0          | 0          | 0          | 0          | 0          | 0          | 1          | 0          | 0          |
| 47            |      | 1           | 0          | 0          | 0          | 0          | 0          | 0          | 0          | 0          | 1          | 0          | 0          |
| 48            |      | 1           | 0          | 0          | 0          | 0          | 0          | 0          | 0          | 0          | 1          | 0          | 0          |
| 49            |      | 1           | 0          | 0          | 0          | 0          | 0          | 0          | 0          | 0          | 1          | 0          | 0          |
| 50            | C26  | 1           | 0          | 0          | 0          | 0          | 0          | 0          | 0          | 0          | 0          | 1          | 0          |
| 51            | C19  | 3           | 0          | 0          | 0          | 0          | 0          | 0          | 0          | 0          | 0          | 0          | 3          |
| 52            |      | 1           | 0          | 0          | 0          | 0          | 0          | 0          | 0          | 0          | 0          | 0          | 1          |
| <b>total</b>  |      | <b>1903</b> | <b>115</b> | <b>176</b> | <b>176</b> | <b>286</b> | <b>230</b> | <b>180</b> | <b>168</b> | <b>170</b> | <b>172</b> | <b>104</b> | <b>126</b> |

**Footnotes:**

(a) Haplotype numbers used only in Tables S3 and S4.

Table S5 Core haplotypes in HGDP and other samples

| haplotype    |            | SNP (a) |      |    |    |    |    |    |    |     |      |      |     |      |      | HGDP count  | other (d)  |
|--------------|------------|---------|------|----|----|----|----|----|----|-----|------|------|-----|------|------|-------------|------------|
| number (b)   | name (c)   | c1      | '857 | c3 | c4 | c5 | c6 | c8 | c9 | c10 | '016 | '624 | c11 | '482 | '449 |             |            |
| 14           | C1         | G       | A    | G  | C  | C  | T  | A  | G  | G   | C    | G    | G   | T    | T    | 9           |            |
| 13           | C1         | G       | A    | G  | C  | C  | T  | A  | G  | G   | C    | G    | G   | T    | G    | 2           |            |
| 12           | C1         | G       | A    | G  | C  | C  | T  | A  | G  | G   | C    | G    | G   | C    | G    | 1           |            |
| 16           | C2         | G       | A    | G  | C  | T  | T  | A  | G  | G   | C    | G    | G   | T    | G    | 28          | 7          |
| 18           | C2         | G       | A    | G  | C  | T  | T  | A  | G  | G   | T    | G    | G   | T    | T    | 6           | 6          |
| 17           | C2         | G       | A    | G  | C  | T  | T  | A  | G  | G   | C    | G    | G   | T    | T    | 3           | 1          |
| 15           | C2         | G       | A    | G  | C  | T  | T  | A  | G  | G   | C    | G    | G   | C    | G    | 1           |            |
| 24           | C2         | G       | A    | G  | C  | T  | T  | A  | G  | G   | T    | G    | G   | C    | G    |             | 1          |
| 23           | C3         | A       | A    | G  | C  | T  | T  | A  | G  | G   | T    | G    | G   | T    | T    | 80          | 1          |
| 11           | C4         | G       | A    | G  | T  | C  | T  | A  | G  | G   | C    | G    | G   | T    | T    | 15          |            |
| 10           | C4         | G       | A    | G  | T  | C  | T  | A  | G  | G   | C    | G    | G   | T    | G    | 3           |            |
| 7            | C5         | G       | A    | A  | T  | C  | T  | A  | G  | G   | C    | G    | G   | C    | G    | 20          | 1          |
| 8            | C5         | G       | A    | A  | T  | C  | T  | A  | G  | G   | C    | A    | G   | C    | G    | 19          | 1          |
| 6            | C6/<br>C7  | G       | A    | A  | T  | C  | T  | G  | G  | G   | C    | G    | G   | C    | G    | 279         | 20         |
| 2            | C8         | G       | G    | A  | T  | C  | C  | G  | A  | G   | C    | G    | G   | C    | G    | 4           |            |
| 1a           | C9/<br>C10 | G       | G    | A  | T  | C  | C  | G  | A  | A   | C    | G    | G   | C    | G    | 374         | 28         |
| 5            | C9/<br>C10 | G       | A    | A  | T  | C  | C  | G  | A  | A   | C    | G    | G   | C    | G    | 5           |            |
| 19a          | C26        | A       | G    | A  | T  | C  | C  | G  | A  | A   | C    | G    | G   | C    | G    | 2           |            |
| 19d          | C11        | A       | G    | A  | T  | C  | C  | G  | A  | A   | C    | G    | A   | C    | G    | 1005        | 133        |
| 20           | C11        | A       | A    | A  | T  | C  | C  | G  | A  | A   | C    | G    | A   | C    | G    | 4           | 2          |
| 1d           | C22        | G       | G    | A  | T  | C  | C  | G  | A  | A   | C    | G    | A   | C    | G    | 14          |            |
| 4            |            | G       | G    | A  | T  | C  | C  | G  | G  | G   | C    | G    | G   | C    | G    | 2           |            |
| 3            |            | G       | G    | A  | T  | C  | C  | G  | G  | A   | C    | G    | G   | C    | G    | 1           |            |
| 9            |            | G       | A    | G  | T  | C  | T  | G  | G  | G   | C    | G    | G   | C    | G    | 1           | 2          |
| 21           |            | A       | A    | A  | T  | C  | T  | G  | G  | G   | C    | G    | G   | C    | G    | 1           |            |
| 22           |            | A       | A    | G  | C  | T  | C  | G  | A  | A   | C    | G    | G   | C    | G    | 1           |            |
| 25           |            | G       | A    | A  | T  | C  | C  | G  | A  | A   | C    | G    | A   | C    | G    |             | 1          |
| <b>total</b> |            |         |      |    |    |    |    |    |    |     |      |      |     |      |      | <b>1880</b> | <b>204</b> |

**Footnotes:**

- (a) SNPs shared with HapMap phase 3 data are identified by nickname; others by last three digits of rs# (Table S2)
- (b) haplotype designations specific to this table
- (c) equivalent classified using 11 SNPs
- (d) data from BEHAR et al. 2010

Table S6 Distribution of core haplotypes in HGDP and other samples

| HGDP code | population name      | haplotype |    |    |    |    |           |    |            |     |     |     |        | total |
|-----------|----------------------|-----------|----|----|----|----|-----------|----|------------|-----|-----|-----|--------|-------|
|           |                      | C1        | C2 | C3 | C4 | C5 | C6/<br>C7 | C8 | C9/<br>C10 | C26 | C11 | C22 | others |       |
| 20        | Orcadian             |           |    |    |    |    |           |    |            |     | 30  |     |        | 30    |
| 21        | Adygei               |           |    |    |    |    |           |    |            |     | 34  |     |        | 34    |
| 22        | Russian              |           |    |    |    |    |           |    |            |     | 47  | 3   |        | 50    |
| 24        | Basque               |           |    |    |    |    |           |    |            |     | 48  |     |        | 48    |
| 25        | French               |           |    |    |    |    |           |    |            |     | 55  | 1   |        | 56    |
| 27        | Italian              |           |    |    |    |    |           |    |            |     | 24  |     |        | 24    |
| 28        | Sardinian            |           |    |    | 1  |    |           |    |            |     | 55  |     |        | 56    |
| 29        | Tuscan               |           |    |    |    |    |           |    |            |     | 16  |     |        | 16    |
| 34        | Mozabite             |           | 2  |    |    | 3  | 2         | 1  |            |     | 50  |     |        | 58    |
| 36        | Bedouin              |           | 2  |    |    |    | 1         |    |            |     | 88  | 1   |        | 92    |
| 37        | Druze                |           |    |    |    |    |           |    |            |     | 84  |     |        | 84    |
| 38        | Palestinian          |           |    |    |    |    | 1         |    | 1          |     | 90  |     |        | 92    |
| 50        | Balochi              |           | 1  |    |    |    |           |    |            |     | 45  | 2   |        | 48    |
| 51        | Brahui               |           |    |    |    |    |           |    |            |     | 49  | 1   |        | 50    |
| 52        | Burusho              |           |    |    |    |    |           |    | 1          |     | 49  |     |        | 50    |
| 54        | Hazara               |           | 1  |    |    |    | 6         |    | 8          |     | 29  |     |        | 44    |
| 56        | Kalash               |           |    |    |    |    |           |    |            |     | 46  |     |        | 46    |
| 57        | Makrani              |           | 1  |    |    |    | 1         |    | 2          |     | 43  | 3   |        | 50    |
| 58        | Pathan<br>(Pashtun)  |           |    |    |    |    | 2         |    |            |     | 41  | 1   |        | 44    |
| 59        | Sindhi               |           |    |    |    |    | 5         |    | 3          |     | 39  | 1   |        | 48    |
| 71        | Melanesian           |           |    |    |    |    | 16        |    | 4          |     |     |     |        | 20    |
| 75        | Papuan               |           |    | 2  |    |    | 25        |    | 7          |     |     |     |        | 34    |
| 81        | Colombian            |           |    | 5  |    |    | 1         |    | 8          |     |     |     |        | 14    |
| 82        | Karitiana            |           |    | 15 |    |    |           |    | 13         |     |     |     |        | 28    |
| 83        | Surui                |           |    | 5  |    |    |           |    | 11         |     |     |     |        | 16    |
| 86        | Maya                 |           |    | 12 |    |    | 6         |    | 19         | 4   |     |     | 1      | 42    |
| 87        | Pima                 |           |    | 10 |    |    |           |    | 18         |     |     |     |        | 28    |
| 430       | Bantu<br>SouthAfrica |           | 4  |    |    | 4  | 2         |    | 5          | 1   |     |     |        | 16    |
| 441       | BantuKenya           | 1         | 3  |    | 2  | 3  | 7         |    | 6          |     |     |     |        | 22    |
| 464       | Mandenka             | 3         | 2  |    | 1  | 14 | 12        |    | 7          | 5   |     |     |        | 44    |
| 465       | Yoruba               | 1         | 3  |    | 1  | 11 | 9         | 2  | 14         | 1   |     |     |        | 42    |
| 488       | BiakaPygmy           | 3         | 5  |    | 6  | 2  | 5         |    | 21         |     |     |     |        | 42    |
| 489       | MbutiPygmy           | 3         | 5  |    | 7  | 2  | 1         |    | 7          |     |     |     | 1      | 26    |
| 494       | San                  | 1         | 8  |    |    |    |           |    |            | 1   |     |     |        | 10    |

continued

Table S6 (concluded)

| HGDP<br>code | population<br>name             | haplotype |           |           |           |           |            |          |            |          |             |           | total    |             |
|--------------|--------------------------------|-----------|-----------|-----------|-----------|-----------|------------|----------|------------|----------|-------------|-----------|----------|-------------|
|              |                                | C1        | C2        | C3        | C4        | C5        | C6/<br>C7  | C8       | C9/<br>C10 | C26      | C11         | C22       |          | others      |
| 601          | Han                            |           |           | 5         |           |           | 22         |          | 39         | 1        | 1           |           |          | 68          |
| 602          | Han-NChina                     |           |           | 3         |           |           | 7          |          | 10         |          |             |           |          | 20          |
| 606          | Dai                            |           | 1         | 2         |           |           | 9          |          | 8          |          |             |           |          | 20          |
| 607          | Daur                           |           |           | 1         |           |           | 7          |          | 8          |          | 2           |           |          | 18          |
| 608          | Hezhen                         |           |           |           |           |           | 7          |          | 8          |          |             |           | 1        | 16          |
| 611          | Lahu                           |           |           | 1         |           |           | 8          |          | 7          |          |             |           |          | 16          |
| 612          | Miao                           |           |           | 3         |           |           | 4          |          | 12         |          |             |           | 1        | 20          |
| 613          | Oroqen                         |           |           |           |           |           | 6          |          | 9          |          | 3           |           |          | 18          |
| 615          | She                            |           |           | 3         |           |           | 7          |          | 9          |          |             |           | 1        | 20          |
| 616          | Tujia                          |           |           | 1         |           |           | 10         |          | 9          |          |             |           |          | 20          |
| 617          | Tu                             |           |           |           |           |           | 7          |          | 12         |          | 1           |           |          | 20          |
| 618          | Xibo                           |           |           |           |           |           | 5          |          | 9          | 1        | 3           |           |          | 18          |
| 619          | Yi                             |           |           | 2         |           |           | 5          |          | 13         |          |             |           |          | 20          |
| 622          | Mongola                        |           |           | 1         |           |           | 11         |          | 5          |          | 3           |           |          | 20          |
| 625          | Naxi                           |           |           |           |           |           | 8          |          | 8          |          |             |           |          | 16          |
| 629          | Uyгур                          |           |           | 1         |           |           | 7          |          | 2          |          | 9           | 1         |          | 20          |
| 677          | Cambodian                      |           |           |           |           |           | 10         |          | 8          |          | 1           |           | 1        | 20          |
| 684          | Japanese                       |           |           | 4         |           |           | 21         | 1        | 30         |          |             |           |          | 56          |
| 699          | Yakut                          |           |           | 4         |           |           | 16         |          | 18         |          | 12          |           |          | 50          |
|              | Moroccan                       |           |           |           |           | 1         | 1          |          |            |          | 18          |           |          | 20          |
|              | Egyptian                       |           | 1         |           |           |           |            |          | 2          |          | 21          |           |          | 24          |
|              | Ethiopian<br>(mixed)           |           | 6         |           |           |           | 4          |          | 7          |          | 21          |           |          | 38          |
|              | Ethiopian                      |           |           |           |           |           |            |          |            |          |             |           |          |             |
|              | Jewish                         |           | 5         |           |           |           | 1          |          | 6          |          | 12          |           | 2        | 26          |
|              | Saudi                          |           |           |           |           |           | 1          |          | 1          |          | 37          |           | 1        | 40          |
|              | Yemeni                         |           | 1         |           |           | 1         | 3          |          | 2          |          | 13          |           |          | 20          |
|              | South Indian<br>(mixed)        |           | 2         | 1         |           |           | 10         |          | 10         |          | 15          |           |          | 38          |
|              | <b>subtypes</b>                | <b>3</b>  | <b>5</b>  | <b>1</b>  | <b>2</b>  | <b>2</b>  | <b>1</b>   | <b>1</b> | <b>2</b>   | <b>1</b> | <b>2</b>    | <b>1</b>  | <b>6</b> |             |
|              | <b>total</b>                   | <b>12</b> | <b>53</b> | <b>81</b> | <b>18</b> | <b>41</b> | <b>299</b> | <b>4</b> | <b>407</b> | <b>2</b> | <b>1146</b> | <b>14</b> | <b>9</b> | <b>2086</b> |
|              | <b>most common<br/>subtype</b> | <b>9</b>  | <b>35</b> | <b>81</b> | <b>15</b> | <b>21</b> | <b>299</b> | <b>4</b> | <b>402</b> | <b>2</b> | <b>1138</b> | <b>14</b> | <b>4</b> |             |

**Table S7** Apparent fragmentation of core-region haplotypes varies with SNP frequency.

| <b>polymorphism cutoff frequency</b> | <b>total polymorphisms</b> | <b>total haplotypes</b> | <b>common haplotypes</b> | <b>fraction in common haplotypes</b> |
|--------------------------------------|----------------------------|-------------------------|--------------------------|--------------------------------------|
| 0.1                                  | 24                         | 104                     | 15                       | 0.92                                 |
| 0.05                                 | 73                         | 187                     | 21                       | 0.85                                 |
| 0.02                                 | 109                        | 215                     | 21                       | 0.83                                 |
| 0.01                                 | 156                        | 291                     | 34                       | 0.78                                 |
| 0.005                                | 239                        | 349                     | 39                       | 0.72                                 |
| 0.0025                               | 287                        | 403                     | 34                       | 0.64                                 |
| 0.0009                               | 504                        | 546                     | 28                       | 0.54                                 |
| all SNPs                             | 744                        | 653                     | 26                       | 0.52                                 |
| all (0.045%)                         | 767                        | 716                     | 25                       | 0.48                                 |

Common haplotypes are defined as those with frequencies > 0.5% in combined sample. Values here are not corrected for undercounting of rare SNPs.

**Table S8 Description of B region haplotypes**

| haplotype  |      | ancestral<br>state | SNP (a) |    |    |    |    |    |
|------------|------|--------------------|---------|----|----|----|----|----|
| number (b) | name |                    | b1      | b2 | b3 | b4 | b5 | b6 |
|            |      |                    | G       | A  | G  | T  | G  | C  |
| 1          | B6   |                    | G       | C  | A  | T  | A  | A  |
| 2          | B7   |                    | T       | C  | A  | T  | G  | A  |
| 3          |      |                    | G       | C  | G  | C  | G  | C  |
| 4          | B2   |                    | G       | A  | G  | C  | G  | C  |
| 5          | B5   |                    | G       | C  | A  | T  | G  | A  |
| 6          | B3   |                    | G       | C  | G  | T  | G  | C  |
| 7          |      |                    | T       | C  | A  | T  | G  | C  |
| 8          | B1   |                    | G       | A  | G  | T  | G  | C  |
| 9          |      |                    | T       | A  | G  | T  | G  | C  |
| 10         | B4   |                    | G       | C  | G  | T  | A  | C  |
| 11         |      |                    | G       | A  | A  | T  | A  | A  |
| 12         |      |                    | T       | C  | A  | T  | A  | A  |
| 13         |      |                    | T       | C  | G  | T  | G  | A  |
| 14         |      |                    | G       | C  | A  | T  | G  | C  |
| 15         |      |                    | G       | A  | A  | T  | G  | A  |
| 16         |      |                    | G       | C  | A  | T  | A  | C  |
| 17         |      |                    | T       | A  | G  | C  | G  | C  |
| 18         |      |                    | T       | C  | G  | T  | G  | C  |
| 19         |      |                    | G       | C  | G  | T  | G  | A  |
| 20         |      |                    | G       | C  | A  | C  | G  | C  |
| 21         |      |                    | G       | A  | G  | C  | G  | A  |

**Footnotes:**

(a) SNPs identified by nickname (Table S2)

(b) Haplotype numbers used only in Tables S8 and S9

**Table S9 Population distribution of B region haplotypes**

| haplotype    |      | population  |            |            |            |            |            |            |            |            |            |            |            |
|--------------|------|-------------|------------|------------|------------|------------|------------|------------|------------|------------|------------|------------|------------|
| number (a)   | name | total       | CEU        | TSI        | GIH        | MKK        | YRI        | LWK        | CHB        | CHD        | JPT        | MEX        | ASW        |
| 1            | B6   | 673         | 109        | 167        | 151        | 100        | 2          | 9          | 23         | 20         | 12         | 65         | 15         |
| 2            | B7   | 238         | 4          | 6          | 2          | 65         | 33         | 20         | 21         | 27         | 28         | 14         | 18         |
| 3            |      | 4           | 2          | 1          | 0          | 0          | 0          | 0          | 0          | 0          | 0          | 0          | 1          |
| 4            | B2   | 511         | 0          | 2          | 13         | 59         | 106        | 76         | 59         | 61         | 68         | 18         | 49         |
| 5            | B5   | 238         | 0          | 0          | 4          | 37         | 64         | 49         | 18         | 20         | 17         | 3          | 26         |
| 6            | B3   | 137         | 0          | 0          | 5          | 0          | 3          | 0          | 43         | 38         | 42         | 3          | 3          |
| 7            |      | 1           | 0          | 0          | 1          | 0          | 0          | 0          | 0          | 0          | 0          | 0          | 0          |
| 8            | B1   | 51          | 0          | 0          | 0          | 14         | 12         | 13         | 1          | 0          | 0          | 0          | 11         |
| 9            |      | 5           | 0          | 0          | 0          | 5          | 0          | 0          | 0          | 0          | 0          | 0          | 0          |
| 10           | B4   | 20          | 0          | 0          | 0          | 3          | 10         | 5          | 0          | 0          | 0          | 0          | 2          |
| 11           |      | 2           | 0          | 0          | 0          | 2          | 0          | 0          | 0          | 0          | 0          | 0          | 0          |
| 12           |      | 3           | 0          | 0          | 0          | 1          | 0          | 0          | 0          | 1          | 0          | 1          | 0          |
| 13           |      | 3           | 0          | 0          | 0          | 0          | 0          | 3          | 0          | 0          | 0          | 0          | 0          |
| 14           |      | 2           | 0          | 0          | 0          | 0          | 0          | 1          | 0          | 1          | 0          | 0          | 0          |
| 15           |      | 2           | 0          | 0          | 0          | 0          | 0          | 2          | 0          | 0          | 0          | 0          | 0          |
| 16           |      | 1           | 0          | 0          | 0          | 0          | 0          | 1          | 0          | 0          | 0          | 0          | 0          |
| 17           |      | 3           | 0          | 0          | 0          | 0          | 0          | 1          | 1          | 0          | 1          | 0          | 0          |
| 18           |      | 2           | 0          | 0          | 0          | 0          | 0          | 0          | 1          | 0          | 1          | 0          | 0          |
| 19           |      | 5           | 0          | 0          | 0          | 0          | 0          | 0          | 1          | 1          | 3          | 0          | 0          |
| 20           |      | 1           | 0          | 0          | 0          | 0          | 0          | 0          | 0          | 1          | 0          | 0          | 0          |
| 21           |      | 1           | 0          | 0          | 0          | 0          | 0          | 0          | 0          | 0          | 0          | 0          | 1          |
| <b>total</b> |      | <b>1903</b> | <b>115</b> | <b>176</b> | <b>176</b> | <b>286</b> | <b>230</b> | <b>180</b> | <b>168</b> | <b>170</b> | <b>172</b> | <b>104</b> | <b>126</b> |

**Footnotes:**

(a) haplotype numbers used only in Tables S8 and S9

**Table S10 Description of D region haplotypes**

| haplotype    |      | SNP (a)         |    |    |    |    |    |    |    |    |
|--------------|------|-----------------|----|----|----|----|----|----|----|----|
| number (b)   | name | ancestral state | d1 | d2 | d3 | d4 | d5 | d6 | d7 | d8 |
|              |      |                 | T  | C  | A  | G  | C  | G  | T  | G  |
| 1            | D4   |                 | T  | C  | A  | T  | T  | A  | T  | G  |
| 2            | D3   |                 | T  | C  | A  | T  | T  | G  | T  | G  |
| 12           | D2   |                 | T  | C  | A  | T  | C  | G  | T  | G  |
| 5            | D1   |                 | T  | C  | A  | G  | C  | G  | T  | G  |
| 11           | D5   |                 | T  | C  | G  | G  | C  | G  | T  | A  |
| 10           | D6   |                 | G  | C  | G  | G  | C  | G  | T  | A  |
| 3            | D7   |                 | G  | T  | G  | G  | C  | G  | T  | A  |
| 4            | D8   |                 | G  | T  | G  | G  | C  | G  | C  | G  |
| 9            |      |                 | G  | T  | G  | G  | C  | G  | T  | G  |
| 16           |      |                 | G  | T  | G  | G  | C  | A  | T  | G  |
| 14           |      |                 | G  | C  | G  | G  | C  | G  | T  | G  |
| 19           |      |                 | T  | C  | A  | T  | C  | G  | T  | A  |
| 8            |      |                 | T  | C  | A  | G  | C  | G  | T  | A  |
| 15           |      |                 | G  | C  | G  | G  | C  | G  | C  | G  |
| 22           |      |                 | T  | C  | A  | T  | T  | G  | C  | G  |
| 18           |      |                 | T  | C  | G  | G  | C  | G  | T  | G  |
| 6            |      |                 | T  | C  | A  | G  | C  | G  | C  | G  |
| 21           |      |                 | T  | C  | A  | T  | T  | G  | T  | A  |
| 23           |      |                 | T  | C  | A  | T  | T  | A  | T  | A  |
| 26           |      |                 | T  | C  | A  | G  | T  | A  | T  | G  |
| 17           |      |                 | T  | T  | G  | G  | C  | G  | T  | G  |
| 13           |      |                 | T  | C  | A  | T  | C  | G  | C  | G  |
| 7            |      |                 | T  | C  | A  | G  | C  | A  | T  | G  |
| 24           |      |                 | G  | T  | G  | G  | T  | G  | T  | A  |
| 20           |      |                 | T  | C  | G  | G  | C  | A  | T  | G  |
| 25           |      |                 | T  | C  | A  | T  | T  | A  | C  | G  |
| 27           |      |                 | G  | T  | A  | T  | T  | G  | T  | G  |
| 28           |      |                 | G  | C  | G  | G  | T  | A  | T  | G  |
| 29           |      |                 | G  | T  | A  | T  | T  | A  | T  | G  |
| 30           |      |                 | G  | T  | G  | G  | C  | G  | C  | A  |
| 31           |      |                 | G  | C  | A  | T  | T  | G  | C  | G  |
| 32           |      |                 | T  | T  | G  | G  | C  | G  | C  | G  |
| 33           |      |                 | T  | C  | G  | G  | C  | G  | C  | G  |
| <b>total</b> |      |                 |    |    |    |    |    |    |    |    |

**Footnotes:**

(a) SNPs identified by nickname (Table S2)

(b) Haplotype numbers used only in Tables S10 and S11



**Table S11 Population distribution of D region haplotypes**

| haplotype     |      | population  |            |            |            |            |            |            |            |            |            |            |            |
|---------------|------|-------------|------------|------------|------------|------------|------------|------------|------------|------------|------------|------------|------------|
| number<br>(a) | name | total       | CEU        | TSI        | GIH        | MKK        | YRI        | LWK        | CHB        | CHD        | JPT        | MEX        | ASW        |
| 1             | D4   | 1080        | 115        | 173        | 172        | 139        | 47         | 52         | 73         | 90         | 92         | 86         | 41         |
| 2             | D3   | 122         | 0          | 3          | 0          | 23         | 27         | 10         | 15         | 15         | 6          | 11         | 12         |
| 12            | D2   | 25          | 0          | 0          | 0          | 6          | 8          | 9          | 0          | 0          | 0          | 0          | 2          |
| 5             | D1   | 67          | 0          | 0          | 1          | 15         | 20         | 17         | 0          | 0          | 0          | 0          | 14         |
| 11            | D5   | 89          | 0          | 0          | 0          | 7          | 50         | 15         | 0          | 0          | 0          | 0          | 17         |
| 10            | D6   | 59          | 0          | 0          | 0          | 14         | 18         | 19         | 0          | 0          | 0          | 0          | 8          |
| 3             | D7   | 154         | 0          | 0          | 2          | 9          | 5          | 5          | 49         | 41         | 41         | 0          | 2          |
| 4             | D8   | 192         | 0          | 0          | 1          | 32         | 34         | 30         | 23         | 17         | 30         | 7          | 18         |
| 9             |      | 13          | 0          | 0          | 0          | 10         | 1          | 0          | 1          | 1          | 0          | 0          | 0          |
| 16            |      | 13          | 0          | 0          | 0          | 3          | 3          | 4          | 2          | 1          | 0          | 0          | 0          |
| 14            |      | 10          | 0          | 0          | 0          | 3          | 2          | 3          | 0          | 0          | 1          | 0          | 1          |
| 19            |      | 9           | 0          | 0          | 0          | 1          | 3          | 5          | 0          | 0          | 0          | 0          | 0          |
| 8             |      | 8           | 0          | 0          | 0          | 4          | 1          | 3          | 0          | 0          | 0          | 0          | 0          |
| 15            |      | 7           | 0          | 0          | 0          | 2          | 2          | 2          | 0          | 0          | 0          | 0          | 1          |
| 22            |      | 7           | 0          | 0          | 0          | 0          | 5          | 0          | 0          | 1          | 0          | 0          | 1          |
| 18            |      | 7           | 0          | 0          | 0          | 5          | 1          | 0          | 0          | 0          | 0          | 0          | 1          |
| 6             |      | 7           | 0          | 0          | 0          | 5          | 1          | 1          | 0          | 0          | 0          | 0          | 0          |
| 21            |      | 5           | 0          | 0          | 0          | 0          | 1          | 2          | 0          | 0          | 0          | 0          | 2          |
| 23            |      | 5           | 0          | 0          | 0          | 0          | 1          | 2          | 1          | 0          | 0          | 0          | 1          |
| 26            |      | 4           | 0          | 0          | 0          | 0          | 0          | 0          | 1          | 2          | 1          | 0          | 0          |
| 17            |      | 4           | 0          | 0          | 0          | 4          | 0          | 0          | 0          | 0          | 0          | 0          | 0          |
| 13            |      | 3           | 0          | 0          | 0          | 1          | 0          | 0          | 1          | 0          | 0          | 0          | 1          |
| 7             |      | 2           | 0          | 0          | 0          | 2          | 0          | 0          | 0          | 0          | 0          | 0          | 0          |
| 24            |      | 2           | 0          | 0          | 0          | 0          | 0          | 1          | 0          | 0          | 0          | 0          | 1          |
| 20            |      | 1           | 0          | 0          | 0          | 1          | 0          | 0          | 0          | 0          | 0          | 0          | 0          |
| 25            |      | 1           | 0          | 0          | 0          | 0          | 0          | 0          | 1          | 0          | 0          | 0          | 0          |
| 27            |      | 1           | 0          | 0          | 0          | 0          | 0          | 0          | 1          | 0          | 0          | 0          | 0          |
| 28            |      | 1           | 0          | 0          | 0          | 0          | 0          | 0          | 0          | 1          | 0          | 0          | 0          |
| 29            |      | 1           | 0          | 0          | 0          | 0          | 0          | 0          | 0          | 1          | 0          | 0          | 0          |
| 30            |      | 1           | 0          | 0          | 0          | 0          | 0          | 0          | 0          | 0          | 1          | 0          | 0          |
| 31            |      | 1           | 0          | 0          | 0          | 0          | 0          | 0          | 0          | 0          | 0          | 0          | 1          |
| 32            |      | 1           | 0          | 0          | 0          | 0          | 0          | 0          | 0          | 0          | 0          | 0          | 1          |
| 33            |      | 1           | 0          | 0          | 0          | 0          | 0          | 0          | 0          | 0          | 0          | 0          | 1          |
| <b>total</b>  |      | <b>1903</b> | <b>115</b> | <b>176</b> | <b>176</b> | <b>286</b> | <b>230</b> | <b>180</b> | <b>168</b> | <b>170</b> | <b>172</b> | <b>104</b> | <b>126</b> |

**Footnotes:**

(a) haplotype numbers used only in Tables S10 and S11

**Table S12 Description of A region haplotypes**

| haplotype    |      | SNP (a)         |    |    |    |    |    |    |    |    |    |     |     |
|--------------|------|-----------------|----|----|----|----|----|----|----|----|----|-----|-----|
| number (b)   | name | ancestral state | a1 | a2 | a3 | a4 | a5 | a6 | a7 | a8 | a9 | a10 | a11 |
|              |      |                 | C  | G  | A  | A  | C  | G  | C  | A  | T  | G   | T   |
| 1            | A1   |                 | C  | A  | C  | G  | C  | T  | A  | A  | T  | G   | T   |
| 2            | A5   |                 | C  | G  | A  | A  | T  | T  | C  | A  | T  | A   | T   |
| 3            | A3   |                 | C  | G  | A  | A  | T  | T  | A  | A  | T  | G   | T   |
| 4            |      |                 | C  | A  | C  | G  | T  | T  | A  | A  | T  | G   | T   |
| 5            |      |                 | T  | G  | A  | A  | T  | G  | C  | C  | T  | G   | T   |
| 6            |      |                 | C  | G  | A  | A  | T  | T  | C  | A  | C  | A   | C   |
| 7            | A9   |                 | C  | G  | A  | A  | C  | G  | C  | A  | T  | G   | T   |
| 8            | A8   |                 | T  | G  | A  | A  | T  | G  | C  | C  | C  | G   | C   |
| 9            |      |                 | T  | G  | A  | A  | T  | T  | A  | A  | T  | G   | T   |
| 10           | A4   |                 | C  | G  | A  | A  | T  | T  | C  | A  | T  | G   | T   |
| 11           |      |                 | C  | G  | A  | A  | C  | G  | C  | A  | T  | A   | T   |
| 12           |      |                 | T  | G  | A  | A  | T  | G  | A  | A  | T  | G   | T   |
| 13           |      |                 | C  | A  | C  | G  | C  | T  | C  | A  | T  | A   | T   |
| 14           |      |                 | C  | G  | A  | A  | T  | G  | C  | A  | T  | A   | T   |
| 15           | A6   |                 | C  | G  | A  | A  | T  | T  | C  | C  | T  | G   | T   |
| 16           | A7   |                 | C  | G  | A  | A  | T  | G  | C  | A  | T  | G   | T   |
| 17           |      |                 | C  | G  | C  | G  | C  | T  | C  | A  | T  | G   | T   |
| 18           |      |                 | C  | G  | A  | A  | T  | T  | C  | C  | C  | G   | C   |
| 19           |      |                 | C  | G  | C  | G  | C  | T  | C  | A  | T  | A   | T   |
| 20           | A2   |                 | C  | G  | C  | G  | C  | T  | A  | A  | T  | G   | T   |
| 21           |      |                 | C  | A  | A  | A  | C  | G  | C  | A  | T  | G   | T   |
| 22           |      |                 | C  | A  | C  | G  | C  | T  | A  | A  | T  | A   | T   |
| 23           |      |                 | C  | G  | A  | A  | T  | T  | A  | A  | T  | A   | T   |
| 24           |      |                 | C  | G  | A  | G  | C  | G  | C  | A  | T  | G   | T   |
| 25           |      |                 | C  | A  | A  | A  | T  | G  | C  | A  | T  | G   | T   |
| 26           |      |                 | C  | A  | A  | A  | T  | T  | A  | A  | T  | G   | T   |
| 27           |      |                 | C  | G  | A  | G  | C  | T  | C  | A  | T  | G   | T   |
| 28           |      |                 | C  | A  | C  | G  | C  | T  | A  | A  | T  | G   | C   |
| 29           |      |                 | C  | A  | C  | A  | C  | T  | A  | A  | T  | G   | T   |
| 30           |      |                 | C  | A  | A  | A  | T  | T  | A  | A  | T  | A   | T   |
| 31           |      |                 | T  | A  | A  | A  | T  | G  | C  | C  | C  | G   | C   |
| 32           |      |                 | T  | G  | A  | A  | T  | G  | C  | A  | T  | G   | C   |
| 33           |      |                 | C  | G  | A  | A  | T  | T  | C  | C  | C  | G   | T   |
| 34           |      |                 | C  | G  | A  | A  | T  | T  | C  | C  | T  | A   | T   |
| <b>total</b> |      |                 |    |    |    |    |    |    |    |    |    |     |     |

**Footnotes:**

(a) SNPs identified by nickname (Table S2)

(b) Haplotype numbers used only in Tables S12 and S13

**Table S13 Population distribution of A region haplotypes**

| haplotype     |      | population  |            |            |            |            |            |            |            |            |            |            |            |
|---------------|------|-------------|------------|------------|------------|------------|------------|------------|------------|------------|------------|------------|------------|
| number<br>(a) | name | total       | CEU        | TSI        | GIH        | MKK        | YRI        | LWK        | CHB        | CHD        | JPT        | MEX        | ASW        |
| 1             | A1   | 660         | 73         | 85         | 93         | 40         | 41         | 22         | 74         | 77         | 79         | 39         | 37         |
| 2             | A5   | 597         | 41         | 83         | 64         | 158        | 57         | 61         | 28         | 26         | 11         | 38         | 30         |
| 3             | A3   | 116         | 1          | 3          | 10         | 3          | 0          | 1          | 33         | 26         | 37         | 2          | 0          |
| 4             |      | 3           | 0          | 2          | 0          | 0          | 0          | 0          | 0          | 0          | 0          | 1          | 0          |
| 5             |      | 1           | 0          | 1          | 0          | 0          | 0          | 0          | 0          | 0          | 0          | 0          | 0          |
| 6             |      | 1           | 0          | 1          | 0          | 0          | 0          | 0          | 0          | 0          | 0          | 0          | 0          |
| 7             | A9   | 225         | 0          | 1          | 0          | 35         | 86         | 61         | 0          | 0          | 0          | 1          | 41         |
| 8             | A8   | 128         | 0          | 0          | 5          | 2          | 2          | 4          | 29         | 36         | 37         | 13         | 0          |
| 9             |      | 1           | 0          | 0          | 1          | 0          | 0          | 0          | 0          | 0          | 0          | 0          | 0          |
| 10            | A4   | 25          | 0          | 0          | 1          | 10         | 4          | 7          | 2          | 0          | 0          | 0          | 1          |
| 11            |      | 6           | 0          | 0          | 1          | 1          | 2          | 2          | 0          | 0          | 0          | 0          | 0          |
| 12            |      | 2           | 0          | 0          | 1          | 0          | 0          | 0          | 0          | 1          | 0          | 0          | 0          |
| 13            |      | 17          | 0          | 0          | 0          | 16         | 0          | 1          | 0          | 0          | 0          | 0          | 0          |
| 14            |      | 2           | 0          | 0          | 0          | 2          | 0          | 0          | 0          | 0          | 0          | 0          | 0          |
| 15            | A6   | 23          | 0          | 0          | 0          | 6          | 7          | 5          | 0          | 0          | 0          | 0          | 5          |
| 16            | A7   | 53          | 0          | 0          | 0          | 9          | 27         | 9          | 0          | 0          | 0          | 0          | 8          |
| 17            |      | 1           | 0          | 0          | 0          | 1          | 0          | 0          | 0          | 0          | 0          | 0          | 0          |
| 18            |      | 3           | 0          | 0          | 0          | 2          | 0          | 1          | 0          | 0          | 0          | 0          | 0          |
| 19            |      | 1           | 0          | 0          | 0          | 1          | 0          | 0          | 0          | 0          | 0          | 0          | 0          |
| 20            | A2   | 22          | 0          | 0          | 0          | 0          | 2          | 3          | 0          | 1          | 6          | 9          | 1          |
| 21            |      | 1           | 0          | 0          | 0          | 0          | 1          | 0          | 0          | 0          | 0          | 0          | 0          |
| 22            |      | 2           | 0          | 0          | 0          | 0          | 1          | 0          | 1          | 0          | 0          | 0          | 0          |
| 23            |      | 1           | 0          | 0          | 0          | 0          | 0          | 1          | 0          | 0          | 0          | 0          | 0          |
| 24            |      | 1           | 0          | 0          | 0          | 0          | 0          | 1          | 0          | 0          | 0          | 0          | 0          |
| 25            |      | 1           | 0          | 0          | 0          | 0          | 0          | 1          | 0          | 0          | 0          | 0          | 0          |
| 26            |      | 1           | 0          | 0          | 0          | 0          | 0          | 0          | 1          | 0          | 0          | 0          | 0          |
| 27            |      | 1           | 0          | 0          | 0          | 0          | 0          | 0          | 0          | 1          | 0          | 0          | 0          |
| 28            |      | 2           | 0          | 0          | 0          | 0          | 0          | 0          | 0          | 2          | 0          | 0          | 0          |
| 29            |      | 1           | 0          | 0          | 0          | 0          | 0          | 0          | 0          | 0          | 1          | 0          | 0          |
| 30            |      | 1           | 0          | 0          | 0          | 0          | 0          | 0          | 0          | 0          | 1          | 0          | 0          |
| 31            |      | 1           | 0          | 0          | 0          | 0          | 0          | 0          | 0          | 0          | 0          | 1          | 0          |
| 32            |      | 1           | 0          | 0          | 0          | 0          | 0          | 0          | 0          | 0          | 0          | 0          | 1          |
| 33            |      | 1           | 0          | 0          | 0          | 0          | 0          | 0          | 0          | 0          | 0          | 0          | 1          |
| 34            |      | 1           | 0          | 0          | 0          | 0          | 0          | 0          | 0          | 0          | 0          | 0          | 1          |
| <b>total</b>  |      | <b>1903</b> | <b>115</b> | <b>176</b> | <b>176</b> | <b>286</b> | <b>230</b> | <b>180</b> | <b>168</b> | <b>170</b> | <b>172</b> | <b>104</b> | <b>126</b> |

**Footnotes:**

(a) haplotype numbers used only in Tables S12 and S13

Table S14 Haplotype combinations in HGDP and other samples

| population |                                | haplotype combination |            |                |              |             |
|------------|--------------------------------|-----------------------|------------|----------------|--------------|-------------|
| HGDP code  | name                           | A1+B6+C11             | A5+B6+C11  | A.other+B6+C11 | B6+C11 total | C11 total   |
| 20         | Orcadian                       | 16                    | 11         | 0              | 27           | 30          |
| 21         | Adygei                         | 21                    | 11         | 0              | 32           | 34          |
| 22         | Russian                        | 26                    | 20         | 0              | 46           | 47          |
| 24         | Basque                         | 26                    | 17         | 1              | 44           | 48          |
| 25         | French                         | 19                    | 31         | 1              | 51           | 55          |
| 27         | Italian                        | 15                    | 6          | 2              | 23           | 24          |
| 28         | Sardinian                      | 17                    | 33         | 1              | 51           | 55          |
| 29         | Tuscan                         | 8                     | 5          | 1              | 14           | 16          |
| 34         | Mozabite                       | 20                    | 24         | 0              | 44           | 50          |
| 36         | Bedouin                        | 33                    | 49         | 2              | 84           | 88          |
| 37         | Druze                          | 24                    | 48         | 6              | 78           | 84          |
| 38         | Palestinian                    | 30                    | 50         | 4              | 84           | 90          |
| 50         | Balochi                        | 18                    | 19         | 1              | 38           | 45          |
| 51         | Brahui                         | 24                    | 22         | 1              | 47           | 49          |
| 52         | Burusho                        | 23                    | 26         | 0              | 49           | 49          |
| 54         | Hazara                         | 23                    | 6          | 0              | 29           | 29          |
| 56         | Kalash                         | 40                    | 6          | 0              | 46           | 46          |
| 57         | Makrani                        | 23                    | 17         | 0              | 40           | 43          |
| 58         | Pathan (Pashtun)               | 18                    | 21         | 1              | 40           | 41          |
| 59         | Sindhi                         | 20                    | 17         | 1              | 38           | 39          |
| 86         | Maya                           | 1                     | 3          | 0              | 4            | 4           |
| 430        | BantuSouthAfrica               | 1                     | 0          | 0              | 1            | 1           |
| 464        | Mandenka                       | 1                     | 3          | 0              | 4            | 5           |
| 465        | Yoruba                         | 0                     | 1          | 0              | 1            | 1           |
| 494        | San                            | 1                     | 0          | 0              | 1            | 1           |
| 601        | Han (a)                        | 1                     | 0          | 1              | 2            | 3           |
| 606        | Dai (a)                        | 0                     | 1          | 0              | 1            | 1           |
| 607        | Daur (a)                       | 2                     | 0          | 0              | 2            | 2           |
| 613        | Oroqen (a)                     | 3                     | 0          | 0              | 3            | 3           |
| 617        | Tu (a)                         | 1                     | 0          | 0              | 1            | 1           |
| 618        | Xibo (a)                       | 3                     | 0          | 0              | 3            | 4           |
| 619        | Yi (a)                         | 1                     | 0          | 0              | 1            | 1           |
| 622        | Mongola (a)                    | 3                     | 0          | 0              | 3            | 3           |
| 629        | Uygur                          | 3                     | 5          | 0              | 8            | 9           |
| 677        | Cambodian (a)                  | 0                     | 1          | 0              | 1            | 1           |
| 699        | Yakut                          | 10                    | 2          | 0              | 12           | 13          |
|            | Yemen                          | 6                     | 5          | 0              | 11           | 13          |
|            | Egypt                          | 10                    | 8          | 2              | 20           | 21          |
|            | Ethiopian Jews                 | 3                     | 6          | 0              | 9            | 12          |
|            | Ethiopian                      | 7                     | 11         | 0              | 18           | 21          |
|            | Saudi                          | 21                    | 15         | 1              | 37           | 37          |
|            | Morocco                        | 5                     | 10         | 1              | 16           | 18          |
|            | South Indian (mixed)           | 5                     | 9          | 0              | 14           | 15          |
|            | <b>East Asian subtotal (a)</b> | <b>14</b>             | <b>2</b>   | <b>1</b>       | <b>18</b>    | <b>20</b>   |
|            | <b>total</b>                   | <b>532</b>            | <b>519</b> | <b>27</b>      | <b>1078</b>  | <b>1152</b> |

**Table S15** Distribution of nucleotide substitutions in C and D regions

| nucleotide change | fraction of total    |                  |
|-------------------|----------------------|------------------|
|                   | hu:chimp<br>(n=1227) | C11D4<br>(n=269) |
| A:G or G:A        | 0.306                | 0.342            |
| T:C or C:T        | 0.355                | 0.346            |
| A:T or T:A        | 0.077                | 0.056            |
| C:G or G:C        | 0.082                | 0.063            |
| A:C or C:A        | 0.103                | 0.097            |
| T:G or G:T        | 0.077                | 0.097            |

**File S1**

**Core region haplotypes defined by polymorphisms with MAF  $\geq$  1% in 1000 Genomes Project data**

Available for download as a tab-delimited text file at <http://www.g3journal.org/lookup/suppl/doi:10.1534/g3.113.007484/-/DC1>

**File S2**

**Haplotype combinations in regions B and C**

Available for download as a tab-delimited text file at <http://www.g3journal.org/lookup/suppl/doi:10.1534/g3.113.007484/-/DC1>

**File S3**

**Haplotype combinations in regions C and D**

Available for download as a tab-delimited text file at <http://www.g3journal.org/lookup/suppl/doi:10.1534/g3.113.007484/-/DC1>



**Files S4**

**Haplotype combinations in regions A and C**

Available for download as a tab-delimited text file at <http://www.g3journal.org/lookup/suppl/doi:10.1534/g3.113.007484/-/DC1>
