# Supplementary material for: Molecular Phylogeography of a Human Autosomal Skin Color Locus Under Natural Selection
Source: PubMed Central journal article supplement (PMC3815065; doi:10.1534/g3.113.007484), 2013-11-01
Supplement: supp_g3.113.007484_FigureS3.pdf [file supp_g3.113.007484_FigureS3.pdf]

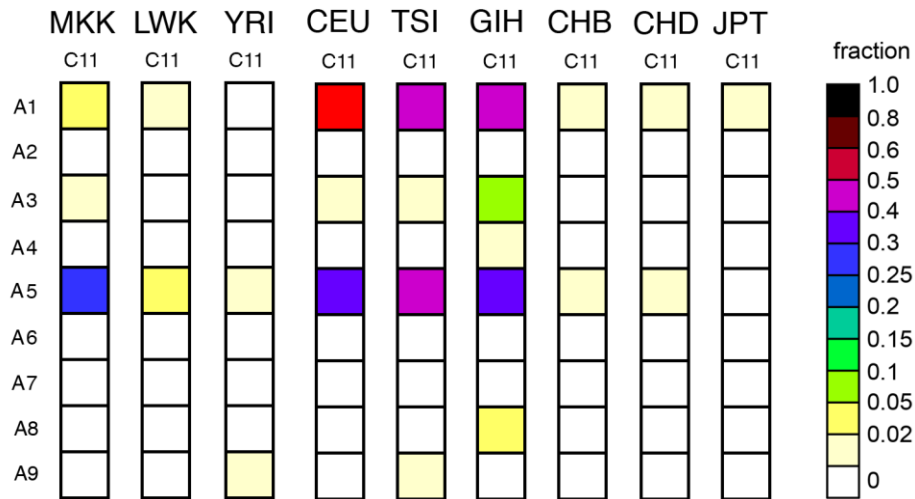

**Figure S3 Association of A-region haplotypes with core haplotype C11**

Scale (heat map, right) is relative to the total sample in each population, as in Figures 4 and S3. A1 and A5 are most commonly associated with C11. Counts are shown in File S3.
