# Supplementary material for: Molecular Phylogeography of a Human Autosomal Skin Color Locus Under Natural Selection
Source: PubMed Central journal article supplement (PMC3815065; doi:10.1534/g3.113.007484), 2013-11-01
Supplement: supp_g3.113.007484_FigureS5.pdf [file supp_g3.113.007484_FigureS5.pdf]

A

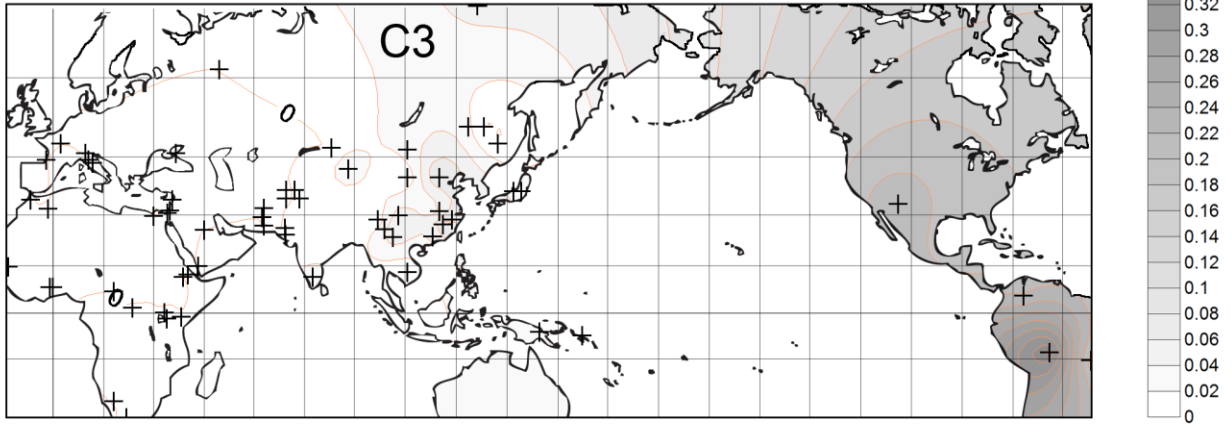

B

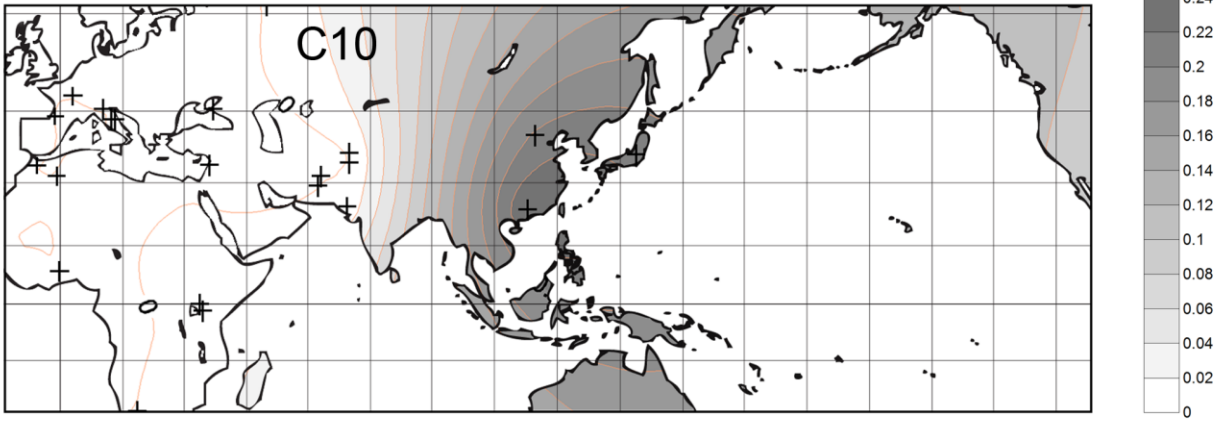

**Figure S5 World distributions of haplotype C3 and C10**

**(A)** Contour plot showing frequencies of haplotype C3

**(B)** Plot of frequency of haplotype C10

Scales are at right of each panel. Sampled populations are indicated (+).
