# Supplementary material for: Molecular Phylogeography of a Human Autosomal Skin Color Locus Under Natural Selection
Source: PubMed Central journal article supplement (PMC3815065; doi:10.1534/g3.113.007484), 2013-11-01
Supplement: supp_g3.113.007484_TableS1.pdf [file supp_g3.113.007484_TableS1.pdf]

**Table S1** *A1117* frequencies used to plot world distribution

| <b>population name or code</b> | <b>sample size<br/>(2N)</b> | <b><i>A1117</i><br/>frequency</b> | <b>reference</b> |
|--------------------------------|-----------------------------|-----------------------------------|------------------|
| Hezhen                         | 18                          | 0.000                             | A                |
| Pima, Mexico                   | 106                         | 0.000                             | B                |
| Koreans                        | 106                         | 0.000                             | B                |
| Ticuna                         | 130                         | 0.046                             | B                |
| Ami                            | 80                          | 0.000                             | B                |
| Mbuti                          | 78                          | 0.000                             | B                |
| Han                            | 116                         | 0.017                             | B                |
| Japanese                       | 98                          | 0.020                             | B                |
| Melanesian, Nasioi             | 46                          | 0.000                             | B                |
| Atayal                         | 84                          | 0.000                             | B                |
| Karitiana                      | 106                         | 0.000                             | B                |
| Micronesians                   | 74                          | 0.068                             | B                |
| Bantu Kenya                    | 24                          | 0.000                             | A                |
| Tujia                          | 20                          | 0.000                             | A                |
| Yizu                           | 20                          | 0.000                             | A                |
| Miaozu                         | 20                          | 0.000                             | A                |
| Dai                            | 20                          | 0.000                             | A                |
| Lahu                           | 20                          | 0.000                             | A                |
| She                            | 20                          | 0.000                             | A                |
| Naxi                           | 20                          | 0.000                             | A                |
| Papuan                         | 34                          | 0.000                             | A                |
| Orcadian                       | 32                          | 1.000                             | A                |
| Columbian                      | 26                          | 0.000                             | A                |
| Belorussian                    | 18                          | 0.944                             | C                |
| Lithuanians                    | 20                          | 1.000                             | C                |
| Biaka                          | 138                         | 0.007                             | B                |
| Pima, Arizona                  | 100                         | 0.010                             | B                |
| Danes                          | 102                         | 0.980                             | B                |
| Surui                          | 90                          | 0.033                             | B                |
| Hungarian                      | 178                         | 0.978                             | B                |
| Japanese, JPT                  | 172                         | 0.012                             | D                |
| Hakka                          | 80                          | 0.013                             | B                |
| Yoruba                         | 154                         | 0.013                             | B                |
| Yoruba, YRI                    | 226                         | 0.013                             | D                |
| Irish                          | 230                         | 1.000                             | B                |
| Finns                          | 72                          | 0.931                             | B                |
| Maya, Yucatan                  | 94                          | 0.128                             | B                |
| European Americans, CEU        | 116                         | 1.000                             | D                |
| Cheyenne                       | 112                         | 0.045                             | B                |
| Han, CHB                       | 168                         | 0.030                             | D                |
| Han                            | 98                          | 0.020                             | B                |
| Lao Loum                       | 238                         | 0.034                             | B                |
| Northern Italian               | 28                          | 1.000                             | A                |

continued

**Table S1 (continued)**

| <b>population name or code</b> | <b>sample size<br/>(2N)</b> | <b>A111T<br/>frequency</b> | <b>reference</b> |
|--------------------------------|-----------------------------|----------------------------|------------------|
| Ibo                            | 96                          | 0.042                      | B                |
| Komi-Zyrian                    | 92                          | 0.913                      | B                |
| Russians                       | 66                          | 1.000                      | B                |
| Yakut                          | 102                         | 0.206                      | B                |
| Mongola                        | 20                          | 0.150                      | A                |
| Tu                             | 20                          | 0.050                      | A                |
| Georgians                      | 40                          | 1.000                      | C                |
| Europeans, Mixed               | 182                         | 0.989                      | B                |
| Russians                       | 96                          | 1.000                      | B                |
| Bantu Southern                 | 16                          | 0.060                      | A                |
| French Basque                  | 48                          | 1.000                      | A                |
| Tuscan                         | 16                          | 1.000                      | A                |
| Spaniards                      | 115                         | 0.987                      | B                |
| African Americans              | 178                         | 0.236                      | B                |
| San                            | 14                          | 0.070                      | A                |
| Chuvash                        | 84                          | 0.929                      | B                |
| Hungarians                     | 40                          | 1.000                      | C                |
| Cambodians, Khmer              | 50                          | 0.080                      | B                |
| Quechua                        | 46                          | 0.152                      | B                |
| Zaramo                         | 80                          | 0.088                      | B                |
| French                         | 58                          | 1.000                      | A                |
| Romanians                      | 32                          | 0.938                      | C                |
| Daur                           | 20                          | 0.100                      | A                |
| Hausa                          | 78                          | 0.115                      | B                |
| Chuvash                        | 34                          | 0.971                      | C                |
| Sandawe                        | 76                          | 0.118                      | B                |
| Khanty                         | 98                          | 0.806                      | B                |
| Orogen                         | 20                          | 0.150                      | A                |
| Mandenka                       | 48                          | 0.160                      | E                |
| Adygei                         | 108                         | 0.982                      | B                |
| Xibo                           | 18                          | 0.190                      | A                |
| Uzbeks                         | 30                          | 0.600                      | C                |
| Uygur                          | 20                          | 0.500                      | A                |
| Spaniards                      | 24                          | 1.000                      | C                |
| Chagga                         | 90                          | 0.267                      | B                |
| Masai                          | 40                          | 0.275                      | B                |
| Tamil                          | 116                         | 0.293                      | F                |
| Lezgins                        | 36                          | 1.000                      | C                |
| Armenians                      | 38                          | 1.000                      | C                |
| Sardinian                      | 56                          | 0.980                      | A                |
| Adygei                         | 34                          | 1.000                      | A                |
| Cypriots                       | 24                          | 1.000                      | C                |
| Turks                          | 38                          | 0.895                      | C                |
| Syrians                        | 32                          | 1.000                      | C                |
| Palestinian                    | 102                         | 0.990                      | A                |

continued

**Table S1 (continued)**

| population name or code | sample size<br>(2N) | A111T<br>frequency | reference |
|-------------------------|---------------------|--------------------|-----------|
| Algerian                | 68                  | 0.912              | B         |
| Kalash                  | 50                  | 1.000              | A         |
| Ethiopian Jewish        | 26                  | 0.460              | C         |
| Lebanese                | 14                  | 1.000              | C         |
| South Indian            | 38                  | 0.470              | C         |
| Mozabite                | 60                  | 0.870              | A         |
| Sinhalese               | 108                 | 0.500              | F         |
| Druze                   | 204                 | 1.000              | B         |
| Jordanians              | 40                  | 1.000              | C         |
| Hazara                  | 48                  | 0.610              | A         |
| Ethiopian               | 38                  | 0.550              | C         |
| Jews, Ethiopian         | 64                  | 0.578              | B         |
| Moroccans               | 96                  | 0.979              | B         |
| Tunisian                | 194                 | 0.923              | B         |
| Moroccan                | 20                  | 0.900              | C         |
| Samaritans              | 78                  | 1.000              | B         |
| Burusho                 | 50                  | 0.980              | A         |
| Libya                   | 62                  | 0.919              | B         |
| Egypt                   | 24                  | 0.880              | C         |
| Yemen                   | 20                  | 0.650              | C         |
| Iranians                | 40                  | 0.925              | C         |
| Pathan (Pashtun)        | 48                  | 0.960              | A         |
| Sindhi                  | 50                  | 0.830              | A         |
| Keralite                | 60                  | 0.733              | B         |
| Bedouin                 | 96                  | 0.970              | A         |
| Brahui                  | 50                  | 1.000              | A         |
| Makrani                 | 50                  | 0.920              | A         |
| Balochi                 | 50                  | 0.980              | A         |
| Saudi                   | 40                  | 0.950              | C         |
| Maasai, MKK             | 286                 | 0.329              | D         |
| Luhya, LWK              | 180                 | 0.067              | D         |
| India, AA-C-IP5         | 36                  | 0.110              | G         |
| India, AA-E-IP3         | 44                  | 0.210              | G         |
| India, DR-C-IP2         | 40                  | 0.020              | G         |
| India, DR-S-IP4         | 42                  | 0.560              | G         |
| India, DR-S-LP2         | 44                  | 0.440              | G         |
| India, DR-S-LP3         | 38                  | 0.390              | G         |
| India, IE-E-IP1         | 44                  | 0.270              | G         |
| India, IE-E-LP2         | 46                  | 0.660              | G         |
| India, IE-E-LP4         | 44                  | 0.610              | G         |
| India, IE-N-IP2         | 46                  | 0.280              | G         |
| India, IE-N-LP1         | 42                  | 0.630              | G         |
| India, IE-N-LP5         | 46                  | 0.710              | G         |
| India, IE-N-LP9         | 46                  | 0.560              | G         |
| India, IE-N-SP4         | 46                  | 0.610              | G         |

continued

**Table S1 (concluded)**

| population name or code | sample size<br>(2N) | A111T<br>frequency | reference |
|-------------------------|---------------------|--------------------|-----------|
| India, IE-NE-IP1        | 44                  | 0.260              | G         |
| India, IE-NE-LP1        | 44                  | 0.480              | G         |
| India, IE-W-LP1         | 42                  | 0.610              | G         |
| India, IE-W-LP2         | 42                  | 0.600              | G         |
| India, IE-W-LP3         | 46                  | 0.590              | G         |
| India, IE-W-LP4         | 44                  | 0.690              | G         |
| India, TB-N-IP1         | 46                  | 0.220              | G         |
| India, TB-N-SP1         | 46                  | 0.360              | G         |
| India, TB-NE-LP1        | 44                  | 0.220              | G         |

## References:

A, NORTON et al. 2007

B, CHEUNG et al. 2000, [alfred.med.yale.edu/alfred/](http://alfred.med.yale.edu/alfred/)

C, BEHAR et al. 2010

D, ALTSHULER et al. 2010, <http://hapmap.ncbi.nlm.nih.gov/>E, <http://www.cephb.fr/en/cephdb/>

F, SOEJIMA and KODA 2007

G, INDIAN GENOME VARIATION CONSORTIUM 2008, <http://igvdb.res.in>
