# Supplementary material for: Molecular Phylogeography of a Human Autosomal Skin Color Locus Under Natural Selection
Source: PubMed Central journal article supplement (PMC3815065; doi:10.1534/g3.113.007484), 2013-11-01
Supplement: supp_g3.113.007484_TableS2.pdf [file supp_g3.113.007484_TableS2.pdf]

**Table S2 HapMap SNPs used for analysis**

| <b>A region</b>        |               |                     |                    |              |
|------------------------|---------------|---------------------|--------------------|--------------|
| <b>nickname</b>        | <b>SNP_ID</b> | <b>position (a)</b> | <b>alleles (b)</b> | <b>notes</b> |
| a1                     | rs16960508    | 46108528            | C/T                | (e)          |
| a2                     | rs1869453     | 46111620            | G/A                | (e)          |
| a3                     | rs1426656     | 46114468            | A/C                |              |
| a4                     | rs17340116    | 46114858            | A/G                |              |
| a5                     | rs1453857     | 46116200            | C/T                | (e)          |
| a6                     | rs2469594     | 46121836            | G/T                |              |
|                        | rs2470104     | 46122159            | T/C                | (e)          |
| a7                     | rs1025199     | 46126798            | C/A                |              |
| a8                     | rs1365453     | 46129898            | A/C                |              |
| a9                     | rs991877      | 46137615            | T/C                | (e)          |
| a10                    | rs2433363     | 46139544            | G/A                | (e)          |
| a11                    | rs16960535    | 46147951            | T/C                |              |
| <b>B region</b>        |               |                     |                    |              |
| <b>nickname</b>        | <b>SNP_ID</b> | <b>position</b>     | <b>alleles</b>     | <b>notes</b> |
| b1                     | rs16960541    | 46157395            | G/T                |              |
| b2                     | rs2433360     | 46161326            | A/C                |              |
| b3                     | rs2459392     | 46163796            | G/A                |              |
|                        | rs10519163    | 46164805            | C/T                | (e)          |
| b4                     | rs7180657     | 46168230            | T/C                | (e)          |
|                        | rs2459383     | 46171162            | G/A                | (e)          |
| b5                     | rs2250072     | 46172199            | G/A                | (e)          |
| b6                     | rs2459385     | 46174380            | C/A                | (e)          |
| <b>C (core) region</b> |               |                     |                    |              |
| <b>nickname</b>        | <b>SNP_ID</b> | <b>position</b>     | <b>alleles</b>     | <b>notes</b> |
|                        | rs12440301    | 46177216            | G/A                | (e)          |
|                        | rs12441154    | 46178248            | C/T                | (f)          |
| c1                     | rs1834640     | 46179457            | G/A                | (c, e)       |
|                        | rs1559857     | 46184100            | A/G                | (e)          |
| c2                     | rs2675345     | 46187491            | G/A                | (f)          |
| c3                     | rs2469592     | 46189167            | G/A                | (e)          |
| c4                     | rs2470101     | 46191159            | C/T                | (e)          |
| c5                     | rs938505      | 46193187            | C/T                | (e)          |
| c6                     | rs2433354     | 46202261            | T/C                | (e)          |
| c7                     | rs2459391     | 46202360            | G/A                | (f)          |
| c8                     | rs2433356     | 46203652            | A/G                | (e)          |
|                        | rs16960620    | 46204191            | A/G                | (f, h)       |
| c9                     | rs2675347     | 46205937            | G/A                | (e, g)       |
|                        | rs2555364     | 46206678            | C/G                | (f, h)       |

continued

**Table 2 (concluded)**

| c10             | rs2675348  | 46208036 | G/A     | (e)       |
|-----------------|------------|----------|---------|-----------|
|                 | rs8040016  | 46212039 | C/T     | (e)       |
|                 | rs16960624 | 46212505 | G/A     | (e)       |
| c11             | rs1426654  | 46213776 | G/A     | (f, h)    |
| c12             | rs2470102  | 46220786 | G/A     | (f)       |
| c13             | rs16960631 | 46226209 | A/G     | (c, d, f) |
| c14             | rs2675349  | 46232679 | G/A     | (f)       |
|                 | rs3736482  | 46237809 | T/C     | (e)       |
|                 | rs9652449  | 46240091 | T/G     | (e)       |
| c15             | rs3817315  | 46248438 | T/C     | (f)       |
| c16             | rs7163587  | 46255311 | T/C     | (f)       |
| <b>D region</b> |            |          |         |           |
| nickname        | SNP_ID     | position | alleles | notes     |
| d1              | rs2413886  | 46265512 | T/G     | (c, e)    |
| d2              | rs34722053 | 46268957 | C/T     | (c)       |
| d3              | rs8037482  | 46275588 | A/G     | (c, e)    |
| d4              | rs7170260  | 46288372 | G/T     | (c)       |
| d5              | rs1878186  | 46295692 | C/T     | (c, e)    |
| d6              | rs9920281  | 46301601 | G/A     | (e)       |
| d7              | rs8032941  | 46302144 | T/C     | (c)       |
| d8              | rs16960679 | 46304763 | G/A     | (c, d)    |

SNPs given nicknames (named SNPs) were genotyped and phased in all 11 HapMap phase 3 populations (release 27), except as otherwise noted. SNPs genotyped in HapMap phase 2 (release 21) are omitted here unless cited elsewhere.

**Footnotes:**

- (a) NCBI B36 coordinates; for B37, add 2212708
- (b) ancestral allele first
- (c) named SNPs absent from TSI
- (d) named SNPs absent from MEX
- (e) present in HGDP
- (f) core-region SNP absent from HGDP data
- (g) absent from HapMap phase 2 release 21
- (h) genotyped in GIARDINA *et al.* (2008)
