# Supplementary material for: Molecular Phylogeography of a Human Autosomal Skin Color Locus Under Natural Selection
Source: PubMed Central journal article supplement (PMC3815065; doi:10.1534/g3.113.007484), 2013-11-01
Supplement: supp_g3.113.007484_TableS3.pdf [file supp_g3.113.007484_TableS3.pdf]

**Table S3 Description of core haplotypes determined using 16 SNPs**

| haplotype     |      | SNP |    |    |    |    |    |    |    |    |     |     |     |     |     |     |     |
|---------------|------|-----|----|----|----|----|----|----|----|----|-----|-----|-----|-----|-----|-----|-----|
| number<br>(a) | name | c1  | c2 | c3 | c4 | c5 | c6 | c7 | c8 | c9 | c10 | c11 | c12 | c13 | c14 | c15 | c16 |
| 18            | C1   | G   | G  | G  | C  | C  | T  | G  | A  | G  | G   | G   | G   | A   | G   | T   | T   |
| 16            | C2   | G   | G  | G  | C  | T  | T  | G  | A  | G  | G   | G   | G   | A   | G   | T   | T   |
| 17            | C3   | A   | G  | G  | C  | T  | T  | G  | A  | G  | G   | G   | G   | A   | G   | T   | T   |
| 20            | C4   | G   | G  | G  | T  | C  | T  | G  | A  | G  | G   | G   | G   | A   | G   | T   | T   |
| 19            | C5   | G   | G  | A  | T  | C  | T  | A  | A  | G  | G   | G   | G   | A   | G   | T   | C   |
| 12            | C6   | G   | G  | A  | T  | C  | T  | A  | G  | G  | G   | G   | G   | A   | G   | T   | C   |
| 22            | C7   | G   | G  | A  | T  | C  | T  | A  | G  | G  | G   | G   | G   | G   | G   | T   | C   |
| 28            | C8   | G   | G  | A  | T  | C  | C  | A  | G  | A  | G   | G   | G   | A   | A   | C   | C   |
| 8             | C9   | G   | G  | A  | T  | C  | C  | A  | G  | A  | A   | G   | G   | A   | A   | C   | C   |
| 13            | C10  | G   | A  | A  | T  | C  | C  | A  | G  | A  | A   | G   | A   | A   | A   | C   | C   |
| 1             | C11  | A   | A  | A  | T  | C  | C  | A  | G  | A  | A   | A   | A   | A   | A   | C   | C   |
| 2             | C25  | A   | A  | A  | T  | T  | C  | A  | A  | A  | A   | A   | A   | A   | A   | C   | C   |
| 3             | C24  | A   | A  | A  | T  | C  | C  | A  | A  | A  | A   | A   | A   | A   | A   | C   | C   |
| 4             | C23  | A   | A  | A  | T  | C  | C  | A  | G  | A  | A   | A   | A   | A   | A   | T   | C   |
| 5             | (b)  | A   | A  | A  | T  | T  | C  | G  | A  | G  | A   | A   | G   | A   | G   | C   | C   |
| 7             |      | A   | G  | A  | T  | C  | C  | A  | G  | A  | A   | A   | A   | A   | A   | C   | C   |
| 9             |      | G   | G  | A  | T  | C  | C  | A  | G  | A  | A   | A   | A   | A   | A   | C   | C   |
| 10            | (b)  | A   | A  | A  | T  | C  | C  | A  | G  | A  | A   | A   | A   | A   | G   | T   | C   |
| 15            | (b)  | A   | G  | G  | C  | T  | C  | G  | A  | A  | A   | A   | A   | A   | A   | C   | C   |
| 25            | C22  | G   | A  | A  | T  | C  | C  | A  | G  | A  | A   | A   | A   | A   | A   | C   | C   |
| 37            |      | G   | G  | A  | T  | C  | T  | A  | A  | G  | G   | A   | G   | A   | G   | T   | C   |
| 41            |      | A   | G  | G  | C  | T  | T  | G  | A  | G  | G   | A   | G   | A   | G   | T   | T   |
| 46            |      | G   | A  | A  | T  | C  | C  | A  | G  | A  | A   | A   | A   | A   | A   | T   | C   |
| 6             | (b)  | A   | G  | G  | C  | C  | T  | A  | G  | A  | G   | G   | A   | A   | A   | T   | T   |
| 11            | (b)  | G   | G  | A  | T  | C  | T  | A  | G  | G  | G   | G   | G   | G   | A   | C   | C   |
| 14            | (b)  | G   | A  | A  | T  | C  | T  | A  | G  | G  | G   | G   | G   | A   | G   | T   | T   |
| 21            | C20  | G   | G  | A  | T  | C  | C  | A  | G  | A  | A   | G   | G   | A   | G   | T   | C   |
| 23            | C12  | G   | G  | G  | C  | T  | T  | G  | A  | G  | G   | G   | G   | A   | G   | T   | C   |
| 24            |      | G   | G  | G  | C  | C  | T  | G  | A  | A  | G   | G   | G   | A   | G   | T   | T   |
| 26            | C17  | G   | G  | A  | T  | C  | T  | G  | G  | G  | G   | G   | G   | A   | G   | T   | C   |
| 27            | C15  | G   | G  | A  | T  | C  | T  | G  | A  | G  | G   | G   | G   | A   | G   | T   | T   |
| 29            | C16  | G   | G  | A  | T  | C  | T  | G  | A  | G  | G   | G   | G   | A   | G   | T   | C   |
| 30            | C13  | G   | G  | G  | C  | T  | T  | G  | G  | G  | G   | G   | G   | A   | G   | T   | T   |
| 31            |      | G   | G  | A  | T  | T  | C  | A  | G  | A  | G   | G   | G   | A   | A   | C   | C   |
| 32            |      | G   | G  | G  | C  | C  | T  | G  | G  | G  | G   | G   | G   | A   | G   | T   | C   |
| 33            | C14  | G   | G  | G  | C  | T  | T  | G  | G  | G  | G   | G   | G   | A   | G   | T   | C   |
| 34            |      | G   | G  | G  | T  | C  | C  | A  | G  | A  | A   | G   | G   | A   | A   | C   | C   |
| 35            |      | G   | G  | A  | T  | C  | T  | A  | G  | A  | G   | G   | G   | A   | G   | T   | C   |
| 36            |      | G   | G  | A  | T  | C  | T  | A  | G  | A  | G   | G   | G   | G   | G   | T   | C   |
| 38            |      | G   | G  | A  | T  | C  | C  | A  | G  | A  | A   | G   | G   | G   | G   | C   | C   |
| 39            | C18  | G   | G  | A  | T  | C  | C  | A  | G  | A  | A   | G   | G   | A   | A   | T   | C   |

continued

Table S3 (concluded)

| haplotype     |      | SNP |    |    |    |    |    |    |    |    |     |     |     |     |     |     |     |
|---------------|------|-----|----|----|----|----|----|----|----|----|-----|-----|-----|-----|-----|-----|-----|
| number<br>(a) | name | c1  | c2 | c3 | c4 | c5 | c6 | c7 | c7 | c9 | c10 | c11 | c12 | c13 | c14 | c15 | c16 |
| 40            |      | G   | G  | A  | T  | C  | T  | A  | A  | G  | A   | G   | G   | A   | G   | T   | C   |
| 42            | C21  | G   | G  | A  | T  | C  | C  | A  | G  | A  | A   | G   | A   | A   | A   | C   | C   |
| 43            |      | G   | G  | A  | T  | C  | C  | A  | G  | A  | G   | G   | G   | A   | G   | C   | T   |
| 44            |      | A   | G  | A  | T  | C  | T  | A  | G  | G  | G   | G   | G   | A   | G   | T   | C   |
| 45            |      | G   | G  | A  | T  | C  | T  | A  | G  | G  | G   | G   | G   | A   | A   | C   | C   |
| 47            |      | G   | A  | A  | T  | C  | C  | A  | G  | A  | A   | G   | G   | G   | A   | T   | C   |
| 48            |      | A   | G  | G  | C  | T  | T  | G  | A  | A  | G   | G   | G   | A   | G   | T   | T   |
| 49            |      | G   | A  | A  | T  | C  | C  | A  | A  | A  | A   | G   | A   | A   | A   | C   | C   |
| 50            | C26  | A   | A  | A  | T  | C  | C  | A  | G  | A  | A   | G   | A   | A   | A   | C   | C   |
| 51            | C19  | G   | G  | A  | T  | C  | C  | A  | G  | A  | A   | G   | G   | A   | G   | C   | C   |
| 52            |      | G   | G  | A  | T  | C  | T  | A  | G  | G  | G   | G   | G   | A   | A   | T   | C   |

**Footnotes:**

(a) Haplotype numbers used only in Tables S3 and S4.

(b) Three misphased pairs are, after correction:

5+6: C11+C2/C3

10+11: C11+C7

14+15: C11+C2
