# Supplementary material for: Molecular Phylogeography of a Human Autosomal Skin Color Locus Under Natural Selection
Source: PubMed Central journal article supplement (PMC3815065; doi:10.1534/g3.113.007484), 2013-11-01
Supplement: supp_g3.113.007484_TableS4.pdf [file supp_g3.113.007484_TableS4.pdf]

**Table S4 Population distribution of core haplotypes determined using 16 SNPs**

| haplotype  |      |       | population |     |     |     |     |     |     |     |     |     |     |
|------------|------|-------|------------|-----|-----|-----|-----|-----|-----|-----|-----|-----|-----|
| number (a) | name | total | CEU        | TSI | GIH | MKK | YRI | LWK | CHB | CHD | JPT | MEX | ASW |
| 18         | C1   | 25    | 0          | 0   | 0   | 7   | 13  | 4   | 0   | 0   | 0   | 0   | 1   |
| 16         | C2   | 125   | 0          | 0   | 0   | 38  | 38  | 26  | 1   | 0   | 0   | 1   | 21  |
| 17         | C3   | 45    | 0          | 0   | 0   | 3   | 0   | 0   | 14  | 14  | 5   | 9   | 0   |
| 20         | C4   | 30    | 0          | 0   | 0   | 6   | 7   | 14  | 0   | 0   | 0   | 0   | 3   |
| 19         | C5   | 98    | 0          | 0   | 0   | 13  | 50  | 14  | 1   | 0   | 1   | 0   | 19  |
| 12         | C6   | 245   | 0          | 0   | 1   | 52  | 42  | 33  | 34  | 21  | 35  | 7   | 20  |
| 22         | C7   | 122   | 0          | 0   | 0   | 1   | 3   | 2   | 40  | 39  | 36  | 0   | 1   |
| 28         | C8   | 10    | 0          | 0   | 0   | 0   | 5   | 1   | 0   | 1   | 0   | 0   | 3   |
| 8          | C9   | 365   | 0          | 0   | 3   | 65  | 61  | 63  | 36  | 44  | 51  | 15  | 27  |
| 13         | C10  | 123   | 0          | 0   | 1   | 0   | 0   | 1   | 34  | 41  | 37  | 9   | 0   |
| 1          | C11  | 638   | 109        | 172 | 164 | 92  | 3   | 9   | 3   | 3   | 1   | 60  | 22  |
| 2          | C25  | 2     | 2          | 0   | 0   | 0   | 0   | 0   | 0   | 0   | 0   | 0   | 0   |
| 3          | C24  | 3     | 2          | 0   | 0   | 0   | 0   | 1   | 0   | 0   | 0   | 0   | 0   |
| 4          | C23  | 5     | 2          | 1   | 0   | 0   | 0   | 0   | 1   | 0   | 0   | 1   | 0   |
| 5          |      | 1     | 0          | 1   | 0   | 0   | 0   | 0   | 0   | 0   | 0   | 0   | 0   |
| 7          |      | 2     | 0          | 1   | 0   | 0   | 0   | 0   | 0   | 0   | 0   | 1   | 0   |
| 9          |      | 1     | 0          | 0   | 1   | 0   | 0   | 0   | 0   | 0   | 0   | 0   | 0   |
| 10         |      | 2     | 0          | 0   | 2   | 0   | 0   | 0   | 0   | 0   | 0   | 0   | 0   |
| 15         |      | 1     | 0          | 0   | 1   | 0   | 0   | 0   | 0   | 0   | 0   | 0   | 0   |
| 25         | C22  | 4     | 0          | 0   | 0   | 2   | 0   | 1   | 1   | 0   | 0   | 0   | 0   |
| 37         |      | 1     | 0          | 0   | 0   | 0   | 0   | 1   | 0   | 0   | 0   | 0   | 0   |
| 41         |      | 1     | 0          | 0   | 0   | 0   | 0   | 0   | 0   | 1   | 0   | 0   | 0   |
| 46         |      | 1     | 0          | 0   | 0   | 0   | 0   | 0   | 0   | 0   | 1   | 0   | 0   |
| 6          |      | 1     | 0          | 1   | 0   | 0   | 0   | 0   | 0   | 0   | 0   | 0   | 0   |
| 11         |      | 2     | 0          | 0   | 2   | 0   | 0   | 0   | 0   | 0   | 0   | 0   | 0   |
| 14         |      | 1     | 0          | 0   | 1   | 0   | 0   | 0   | 0   | 0   | 0   | 0   | 0   |
| 21         | C20  | 5     | 0          | 0   | 0   | 4   | 1   | 0   | 0   | 0   | 0   | 0   | 0   |
| 23         | C12  | 2     | 0          | 0   | 0   | 2   | 0   | 0   | 0   | 0   | 0   | 0   | 0   |
| 24         |      | 1     | 0          | 0   | 0   | 1   | 0   | 0   | 0   | 0   | 0   | 0   | 0   |
| 26         | C17  | 8     | 0          | 0   | 0   | 0   | 1   | 5   | 0   | 0   | 0   | 0   | 2   |
| 27         | C15  | 4     | 0          | 0   | 0   | 0   | 2   | 0   | 0   | 0   | 0   | 0   | 2   |
| 29         | C16  | 1     | 0          | 0   | 0   | 0   | 1   | 0   | 0   | 0   | 0   | 0   | 0   |
| 30         | C13  | 1     | 0          | 0   | 0   | 0   | 1   | 0   | 0   | 0   | 0   | 0   | 0   |
| 31         |      | 1     | 0          | 0   | 0   | 0   | 1   | 0   | 0   | 0   | 0   | 0   | 0   |
| 32         |      | 1     | 0          | 0   | 0   | 0   | 1   | 0   | 0   | 0   | 0   | 0   | 0   |
| 33         | C14  | 3     | 0          | 0   | 0   | 0   | 0   | 2   | 0   | 0   | 0   | 0   | 1   |
| 34         |      | 1     | 0          | 0   | 0   | 0   | 0   | 1   | 0   | 0   | 0   | 0   | 0   |
| 35         |      | 1     | 0          | 0   | 0   | 0   | 0   | 1   | 0   | 0   | 0   | 0   | 0   |
| 36         |      | 1     | 0          | 0   | 0   | 0   | 0   | 1   | 0   | 0   | 0   | 0   | 0   |
| 38         |      | 2     | 0          | 0   | 0   | 0   | 0   | 0   | 1   | 1   | 0   | 0   | 0   |
| 39         | C18  | 2     | 0          | 0   | 0   | 0   | 0   | 0   | 1   | 0   | 1   | 0   | 0   |

continued

Table S4 (concluded)

| haplotype     |      |             | population |            |            |            |            |            |            |            |            |            |            |
|---------------|------|-------------|------------|------------|------------|------------|------------|------------|------------|------------|------------|------------|------------|
| number<br>(a) | name | total       | CEU        | TSI        | GIH        | MKK        | YRI        | LWK        | CHB        | CHD        | JPT        | MEX        | ASW        |
| 40            |      | 2           | 0          | 0          | 0          | 0          | 0          | 0          | 1          | 1          | 0          | 0          | 0          |
| 42            | C21  | 2           | 0          | 0          | 0          | 0          | 0          | 0          | 0          | 2          | 0          | 0          | 0          |
| 43            |      | 1           | 0          | 0          | 0          | 0          | 0          | 0          | 0          | 1          | 0          | 0          | 0          |
| 44            |      | 1           | 0          | 0          | 0          | 0          | 0          | 0          | 0          | 1          | 0          | 0          | 0          |
| 45            |      | 1           | 0          | 0          | 0          | 0          | 0          | 0          | 0          | 0          | 1          | 0          | 0          |
| 47            |      | 1           | 0          | 0          | 0          | 0          | 0          | 0          | 0          | 0          | 1          | 0          | 0          |
| 48            |      | 1           | 0          | 0          | 0          | 0          | 0          | 0          | 0          | 0          | 1          | 0          | 0          |
| 49            |      | 1           | 0          | 0          | 0          | 0          | 0          | 0          | 0          | 0          | 1          | 0          | 0          |
| 50            | C26  | 1           | 0          | 0          | 0          | 0          | 0          | 0          | 0          | 0          | 0          | 1          | 0          |
| 51            | C19  | 3           | 0          | 0          | 0          | 0          | 0          | 0          | 0          | 0          | 0          | 0          | 3          |
| 52            |      | 1           | 0          | 0          | 0          | 0          | 0          | 0          | 0          | 0          | 0          | 0          | 1          |
| <b>total</b>  |      | <b>1903</b> | <b>115</b> | <b>176</b> | <b>176</b> | <b>286</b> | <b>230</b> | <b>180</b> | <b>168</b> | <b>170</b> | <b>172</b> | <b>104</b> | <b>126</b> |

**Footnotes:**

(a) Haplotype numbers used only in Tables S3 and S4.
