# Supplementary material for: Molecular Phylogeography of a Human Autosomal Skin Color Locus Under Natural Selection
Source: PubMed Central journal article supplement (PMC3815065; doi:10.1534/g3.113.007484), 2013-11-01
Supplement: supp_g3.113.007484_TableS5.pdf [file supp_g3.113.007484_TableS5.pdf]

Table S5 Core haplotypes in HGDP and other samples

| haplotype    |            | SNP (a) |      |    |    |    |    |    |    |     |      |      |     |      |      | HGDP count  | other (d)  |
|--------------|------------|---------|------|----|----|----|----|----|----|-----|------|------|-----|------|------|-------------|------------|
| number (b)   | name (c)   | c1      | '857 | c3 | c4 | c5 | c6 | c8 | c9 | c10 | '016 | '624 | c11 | '482 | '449 |             |            |
| 14           | C1         | G       | A    | G  | C  | C  | T  | A  | G  | G   | C    | G    | G   | T    | T    | 9           |            |
| 13           | C1         | G       | A    | G  | C  | C  | T  | A  | G  | G   | C    | G    | G   | T    | G    | 2           |            |
| 12           | C1         | G       | A    | G  | C  | C  | T  | A  | G  | G   | C    | G    | G   | C    | G    | 1           |            |
| 16           | C2         | G       | A    | G  | C  | T  | T  | A  | G  | G   | C    | G    | G   | T    | G    | 28          | 7          |
| 18           | C2         | G       | A    | G  | C  | T  | T  | A  | G  | G   | T    | G    | G   | T    | T    | 6           | 6          |
| 17           | C2         | G       | A    | G  | C  | T  | T  | A  | G  | G   | C    | G    | G   | T    | T    | 3           | 1          |
| 15           | C2         | G       | A    | G  | C  | T  | T  | A  | G  | G   | C    | G    | G   | C    | G    | 1           |            |
| 24           | C2         | G       | A    | G  | C  | T  | T  | A  | G  | G   | T    | G    | G   | C    | G    |             | 1          |
| 23           | C3         | A       | A    | G  | C  | T  | T  | A  | G  | G   | T    | G    | G   | T    | T    | 80          | 1          |
| 11           | C4         | G       | A    | G  | T  | C  | T  | A  | G  | G   | C    | G    | G   | T    | T    | 15          |            |
| 10           | C4         | G       | A    | G  | T  | C  | T  | A  | G  | G   | C    | G    | G   | T    | G    | 3           |            |
| 7            | C5         | G       | A    | A  | T  | C  | T  | A  | G  | G   | C    | G    | G   | C    | G    | 20          | 1          |
| 8            | C5         | G       | A    | A  | T  | C  | T  | A  | G  | G   | C    | A    | G   | C    | G    | 19          | 1          |
| 6            | C6/<br>C7  | G       | A    | A  | T  | C  | T  | G  | G  | G   | C    | G    | G   | C    | G    | 279         | 20         |
| 2            | C8         | G       | G    | A  | T  | C  | C  | G  | A  | G   | C    | G    | G   | C    | G    | 4           |            |
| 1a           | C9/<br>C10 | G       | G    | A  | T  | C  | C  | G  | A  | A   | C    | G    | G   | C    | G    | 374         | 28         |
| 5            | C9/<br>C10 | G       | A    | A  | T  | C  | C  | G  | A  | A   | C    | G    | G   | C    | G    | 5           |            |
| 19a          | C26        | A       | G    | A  | T  | C  | C  | G  | A  | A   | C    | G    | G   | C    | G    | 2           |            |
| 19d          | C11        | A       | G    | A  | T  | C  | C  | G  | A  | A   | C    | G    | A   | C    | G    | 1005        | 133        |
| 20           | C11        | A       | A    | A  | T  | C  | C  | G  | A  | A   | C    | G    | A   | C    | G    | 4           | 2          |
| 1d           | C22        | G       | G    | A  | T  | C  | C  | G  | A  | A   | C    | G    | A   | C    | G    | 14          |            |
| 4            |            | G       | G    | A  | T  | C  | C  | G  | G  | G   | C    | G    | G   | C    | G    | 2           |            |
| 3            |            | G       | G    | A  | T  | C  | C  | G  | G  | A   | C    | G    | G   | C    | G    | 1           |            |
| 9            |            | G       | A    | G  | T  | C  | T  | G  | G  | G   | C    | G    | G   | C    | G    | 1           | 2          |
| 21           |            | A       | A    | A  | T  | C  | T  | G  | G  | G   | C    | G    | G   | C    | G    | 1           |            |
| 22           |            | A       | A    | G  | C  | T  | C  | G  | A  | A   | C    | G    | G   | C    | G    | 1           |            |
| 25           |            | G       | A    | A  | T  | C  | C  | G  | A  | A   | C    | G    | A   | C    | G    |             | 1          |
| <b>total</b> |            |         |      |    |    |    |    |    |    |     |      |      |     |      |      | <b>1880</b> | <b>204</b> |

**Footnotes:**

- (a) SNPs shared with HapMap phase 3 data are identified by nickname; others by last three digits of rs# (Table S2)
- (b) haplotype designations specific to this table
- (c) equivalent classified using 11 SNPs
- (d) data from BEHAR et al. 2010
