# Supplementary material for: Molecular Phylogeography of a Human Autosomal Skin Color Locus Under Natural Selection
Source: PubMed Central journal article supplement (PMC3815065; doi:10.1534/g3.113.007484), 2013-11-01
Supplement: supp_g3.113.007484_TableS6.pdf [file supp_g3.113.007484_TableS6.pdf]

Table S6 Distribution of core haplotypes in HGDP and other samples

| HGDP code | population name      | haplotype |    |    |    |    |           |    |            |     |     |     |        | total |
|-----------|----------------------|-----------|----|----|----|----|-----------|----|------------|-----|-----|-----|--------|-------|
|           |                      | C1        | C2 | C3 | C4 | C5 | C6/<br>C7 | C8 | C9/<br>C10 | C26 | C11 | C22 | others |       |
| 20        | Orcadian             |           |    |    |    |    |           |    |            |     | 30  |     |        | 30    |
| 21        | Adygei               |           |    |    |    |    |           |    |            |     | 34  |     |        | 34    |
| 22        | Russian              |           |    |    |    |    |           |    |            |     | 47  | 3   |        | 50    |
| 24        | Basque               |           |    |    |    |    |           |    |            |     | 48  |     |        | 48    |
| 25        | French               |           |    |    |    |    |           |    |            |     | 55  | 1   |        | 56    |
| 27        | Italian              |           |    |    |    |    |           |    |            |     | 24  |     |        | 24    |
| 28        | Sardinian            |           |    |    | 1  |    |           |    |            |     | 55  |     |        | 56    |
| 29        | Tuscan               |           |    |    |    |    |           |    |            |     | 16  |     |        | 16    |
| 34        | Mozabite             |           | 2  |    |    | 3  | 2         | 1  |            |     | 50  |     |        | 58    |
| 36        | Bedouin              |           | 2  |    |    |    | 1         |    |            |     | 88  | 1   |        | 92    |
| 37        | Druze                |           |    |    |    |    |           |    |            |     | 84  |     |        | 84    |
| 38        | Palestinian          |           |    |    |    |    | 1         |    | 1          |     | 90  |     |        | 92    |
| 50        | Balochi              |           | 1  |    |    |    |           |    |            |     | 45  | 2   |        | 48    |
| 51        | Brahui               |           |    |    |    |    |           |    |            |     | 49  | 1   |        | 50    |
| 52        | Burusho              |           |    |    |    |    |           |    | 1          |     | 49  |     |        | 50    |
| 54        | Hazara               |           | 1  |    |    |    | 6         |    | 8          |     | 29  |     |        | 44    |
| 56        | Kalash               |           |    |    |    |    |           |    |            |     | 46  |     |        | 46    |
| 57        | Makrani              |           | 1  |    |    |    | 1         |    | 2          |     | 43  | 3   |        | 50    |
| 58        | Pathan<br>(Pashtun)  |           |    |    |    |    | 2         |    |            |     | 41  | 1   |        | 44    |
| 59        | Sindhi               |           |    |    |    |    | 5         |    | 3          |     | 39  | 1   |        | 48    |
| 71        | Melanesian           |           |    |    |    |    | 16        |    | 4          |     |     |     |        | 20    |
| 75        | Papuan               |           |    | 2  |    |    | 25        |    | 7          |     |     |     |        | 34    |
| 81        | Colombian            |           |    | 5  |    |    | 1         |    | 8          |     |     |     |        | 14    |
| 82        | Karitiana            |           |    | 15 |    |    |           |    | 13         |     |     |     |        | 28    |
| 83        | Surui                |           |    | 5  |    |    |           |    | 11         |     |     |     |        | 16    |
| 86        | Maya                 |           |    | 12 |    |    | 6         |    | 19         |     | 4   |     | 1      | 42    |
| 87        | Pima                 |           |    | 10 |    |    |           |    | 18         |     |     |     |        | 28    |
| 430       | Bantu<br>SouthAfrica |           | 4  |    |    | 4  | 2         |    | 5          |     | 1   |     |        | 16    |
| 441       | BantuKenya           | 1         | 3  |    | 2  | 3  | 7         |    | 6          |     |     |     |        | 22    |
| 464       | Mandenka             | 3         | 2  |    | 1  | 14 | 12        |    | 7          |     | 5   |     |        | 44    |
| 465       | Yoruba               | 1         | 3  |    | 1  | 11 | 9         | 2  | 14         |     | 1   |     |        | 42    |
| 488       | BiakaPygmy           | 3         | 5  |    | 6  | 2  | 5         |    | 21         |     |     |     |        | 42    |
| 489       | MbutiPygmy           | 3         | 5  |    | 7  | 2  | 1         |    | 7          |     |     |     | 1      | 26    |
| 494       | San                  | 1         | 8  |    |    |    |           |    |            |     | 1   |     |        | 10    |

continued

Table S6 (concluded)

| HGDP<br>code | population<br>name             | haplotype |           |           |           |           |            |          |            |          |             |           | total    |             |
|--------------|--------------------------------|-----------|-----------|-----------|-----------|-----------|------------|----------|------------|----------|-------------|-----------|----------|-------------|
|              |                                | C1        | C2        | C3        | C4        | C5        | C6/<br>C7  | C8       | C9/<br>C10 | C26      | C11         | C22       |          | others      |
| 601          | Han                            |           |           | 5         |           |           | 22         |          | 39         | 1        | 1           |           |          | 68          |
| 602          | Han-NChina                     |           |           | 3         |           |           | 7          |          | 10         |          |             |           |          | 20          |
| 606          | Dai                            |           | 1         | 2         |           |           | 9          |          | 8          |          |             |           |          | 20          |
| 607          | Daur                           |           |           | 1         |           |           | 7          |          | 8          |          | 2           |           |          | 18          |
| 608          | Hezhen                         |           |           |           |           |           | 7          |          | 8          |          |             |           | 1        | 16          |
| 611          | Lahu                           |           |           | 1         |           |           | 8          |          | 7          |          |             |           |          | 16          |
| 612          | Miao                           |           |           | 3         |           |           | 4          |          | 12         |          |             |           | 1        | 20          |
| 613          | Oroqen                         |           |           |           |           |           | 6          |          | 9          |          | 3           |           |          | 18          |
| 615          | She                            |           |           | 3         |           |           | 7          |          | 9          |          |             |           | 1        | 20          |
| 616          | Tujia                          |           |           | 1         |           |           | 10         |          | 9          |          |             |           |          | 20          |
| 617          | Tu                             |           |           |           |           |           | 7          |          | 12         |          | 1           |           |          | 20          |
| 618          | Xibo                           |           |           |           |           |           | 5          |          | 9          | 1        | 3           |           |          | 18          |
| 619          | Yi                             |           |           | 2         |           |           | 5          |          | 13         |          |             |           |          | 20          |
| 622          | Mongola                        |           |           | 1         |           |           | 11         |          | 5          |          | 3           |           |          | 20          |
| 625          | Naxi                           |           |           |           |           |           | 8          |          | 8          |          |             |           |          | 16          |
| 629          | Uyгур                          |           |           | 1         |           |           | 7          |          | 2          |          | 9           | 1         |          | 20          |
| 677          | Cambodian                      |           |           |           |           |           | 10         |          | 8          |          | 1           |           | 1        | 20          |
| 684          | Japanese                       |           |           | 4         |           |           | 21         | 1        | 30         |          |             |           |          | 56          |
| 699          | Yakut                          |           |           | 4         |           |           | 16         |          | 18         |          | 12          |           |          | 50          |
|              | Moroccan                       |           |           |           |           | 1         | 1          |          |            |          | 18          |           |          | 20          |
|              | Egyptian                       |           | 1         |           |           |           |            |          | 2          |          | 21          |           |          | 24          |
|              | Ethiopian<br>(mixed)           |           | 6         |           |           |           | 4          |          | 7          |          | 21          |           |          | 38          |
|              | Ethiopian                      |           |           |           |           |           |            |          |            |          |             |           |          |             |
|              | Jewish                         |           | 5         |           |           |           | 1          |          | 6          |          | 12          |           | 2        | 26          |
|              | Saudi                          |           |           |           |           |           | 1          |          | 1          |          | 37          |           | 1        | 40          |
|              | Yemeni                         |           | 1         |           |           | 1         | 3          |          | 2          |          | 13          |           |          | 20          |
|              | South Indian<br>(mixed)        |           | 2         | 1         |           |           | 10         |          | 10         |          | 15          |           |          | 38          |
|              | <b>subtypes</b>                | <b>3</b>  | <b>5</b>  | <b>1</b>  | <b>2</b>  | <b>2</b>  | <b>1</b>   | <b>1</b> | <b>2</b>   | <b>1</b> | <b>2</b>    | <b>1</b>  | <b>6</b> |             |
|              | <b>total</b>                   | <b>12</b> | <b>53</b> | <b>81</b> | <b>18</b> | <b>41</b> | <b>299</b> | <b>4</b> | <b>407</b> | <b>2</b> | <b>1146</b> | <b>14</b> | <b>9</b> | <b>2086</b> |
|              | <b>most common<br/>subtype</b> | <b>9</b>  | <b>35</b> | <b>81</b> | <b>15</b> | <b>21</b> | <b>299</b> | <b>4</b> | <b>402</b> | <b>2</b> | <b>1138</b> | <b>14</b> | <b>4</b> |             |
