# Supplementary material for: Molecular Phylogeography of a Human Autosomal Skin Color Locus Under Natural Selection
Source: PubMed Central journal article supplement (PMC3815065; doi:10.1534/g3.113.007484), 2013-11-01
Supplement: supp_g3.113.007484_TableS7.pdf [file supp_g3.113.007484_TableS7.pdf]

**Table S7** Apparent fragmentation of core-region haplotypes varies with SNP frequency.

| <b>polymorphism cutoff frequency</b> | <b>total polymorphisms</b> | <b>total haplotypes</b> | <b>common haplotypes</b> | <b>fraction in common haplotypes</b> |
|--------------------------------------|----------------------------|-------------------------|--------------------------|--------------------------------------|
| 0.1                                  | 24                         | 104                     | 15                       | 0.92                                 |
| 0.05                                 | 73                         | 187                     | 21                       | 0.85                                 |
| 0.02                                 | 109                        | 215                     | 21                       | 0.83                                 |
| 0.01                                 | 156                        | 291                     | 34                       | 0.78                                 |
| 0.005                                | 239                        | 349                     | 39                       | 0.72                                 |
| 0.0025                               | 287                        | 403                     | 34                       | 0.64                                 |
| 0.0009                               | 504                        | 546                     | 28                       | 0.54                                 |
| all SNPs                             | 744                        | 653                     | 26                       | 0.52                                 |
| all (0.045%)                         | 767                        | 716                     | 25                       | 0.48                                 |

Common haplotypes are defined as those with frequencies > 0.5% in combined sample. Values here are not corrected for undercounting of rare SNPs.
