# Supplementary material for: Molecular Phylogeography of a Human Autosomal Skin Color Locus Under Natural Selection
Source: PubMed Central journal article supplement (PMC3815065; doi:10.1534/g3.113.007484), 2013-11-01
Supplement: supp_g3.113.007484_TableS8.pdf [file supp_g3.113.007484_TableS8.pdf]

**Table S8 Description of B region haplotypes**

| haplotype  |      | ancestral<br>state | SNP (a) |    |    |    |    |    |
|------------|------|--------------------|---------|----|----|----|----|----|
| number (b) | name |                    | b1      | b2 | b3 | b4 | b5 | b6 |
|            |      |                    | G       | A  | G  | T  | G  | C  |
| 1          | B6   |                    | G       | C  | A  | T  | A  | A  |
| 2          | B7   |                    | T       | C  | A  | T  | G  | A  |
| 3          |      |                    | G       | C  | G  | C  | G  | C  |
| 4          | B2   |                    | G       | A  | G  | C  | G  | C  |
| 5          | B5   |                    | G       | C  | A  | T  | G  | A  |
| 6          | B3   |                    | G       | C  | G  | T  | G  | C  |
| 7          |      |                    | T       | C  | A  | T  | G  | C  |
| 8          | B1   |                    | G       | A  | G  | T  | G  | C  |
| 9          |      |                    | T       | A  | G  | T  | G  | C  |
| 10         | B4   |                    | G       | C  | G  | T  | A  | C  |
| 11         |      |                    | G       | A  | A  | T  | A  | A  |
| 12         |      |                    | T       | C  | A  | T  | A  | A  |
| 13         |      |                    | T       | C  | G  | T  | G  | A  |
| 14         |      |                    | G       | C  | A  | T  | G  | C  |
| 15         |      |                    | G       | A  | A  | T  | G  | A  |
| 16         |      |                    | G       | C  | A  | T  | A  | C  |
| 17         |      |                    | T       | A  | G  | C  | G  | C  |
| 18         |      |                    | T       | C  | G  | T  | G  | C  |
| 19         |      |                    | G       | C  | G  | T  | G  | A  |
| 20         |      |                    | G       | C  | A  | C  | G  | C  |
| 21         |      |                    | G       | A  | G  | C  | G  | A  |

**Footnotes:**

(a) SNPs identified by nickname (Table S2)

(b) Haplotype numbers used only in Tables S8 and S9
