# Supplementary material for: Molecular Phylogeography of a Human Autosomal Skin Color Locus Under Natural Selection
Source: PubMed Central journal article supplement (PMC3815065; doi:10.1534/g3.113.007484), 2013-11-01
Supplement: supp_g3.113.007484_TableS9.pdf [file supp_g3.113.007484_TableS9.pdf]

**Table S9 Population distribution of B region haplotypes**

| haplotype    |      | population  |            |            |            |            |            |            |            |            |            |            |            |
|--------------|------|-------------|------------|------------|------------|------------|------------|------------|------------|------------|------------|------------|------------|
| number (a)   | name | total       | CEU        | TSI        | GIH        | MKK        | YRI        | LWK        | CHB        | CHD        | JPT        | MEX        | ASW        |
| 1            | B6   | 673         | 109        | 167        | 151        | 100        | 2          | 9          | 23         | 20         | 12         | 65         | 15         |
| 2            | B7   | 238         | 4          | 6          | 2          | 65         | 33         | 20         | 21         | 27         | 28         | 14         | 18         |
| 3            |      | 4           | 2          | 1          | 0          | 0          | 0          | 0          | 0          | 0          | 0          | 0          | 1          |
| 4            | B2   | 511         | 0          | 2          | 13         | 59         | 106        | 76         | 59         | 61         | 68         | 18         | 49         |
| 5            | B5   | 238         | 0          | 0          | 4          | 37         | 64         | 49         | 18         | 20         | 17         | 3          | 26         |
| 6            | B3   | 137         | 0          | 0          | 5          | 0          | 3          | 0          | 43         | 38         | 42         | 3          | 3          |
| 7            |      | 1           | 0          | 0          | 1          | 0          | 0          | 0          | 0          | 0          | 0          | 0          | 0          |
| 8            | B1   | 51          | 0          | 0          | 0          | 14         | 12         | 13         | 1          | 0          | 0          | 0          | 11         |
| 9            |      | 5           | 0          | 0          | 0          | 5          | 0          | 0          | 0          | 0          | 0          | 0          | 0          |
| 10           | B4   | 20          | 0          | 0          | 0          | 3          | 10         | 5          | 0          | 0          | 0          | 0          | 2          |
| 11           |      | 2           | 0          | 0          | 0          | 2          | 0          | 0          | 0          | 0          | 0          | 0          | 0          |
| 12           |      | 3           | 0          | 0          | 0          | 1          | 0          | 0          | 0          | 1          | 0          | 1          | 0          |
| 13           |      | 3           | 0          | 0          | 0          | 0          | 0          | 3          | 0          | 0          | 0          | 0          | 0          |
| 14           |      | 2           | 0          | 0          | 0          | 0          | 0          | 1          | 0          | 1          | 0          | 0          | 0          |
| 15           |      | 2           | 0          | 0          | 0          | 0          | 0          | 2          | 0          | 0          | 0          | 0          | 0          |
| 16           |      | 1           | 0          | 0          | 0          | 0          | 0          | 1          | 0          | 0          | 0          | 0          | 0          |
| 17           |      | 3           | 0          | 0          | 0          | 0          | 0          | 1          | 1          | 0          | 1          | 0          | 0          |
| 18           |      | 2           | 0          | 0          | 0          | 0          | 0          | 0          | 1          | 0          | 1          | 0          | 0          |
| 19           |      | 5           | 0          | 0          | 0          | 0          | 0          | 0          | 1          | 1          | 3          | 0          | 0          |
| 20           |      | 1           | 0          | 0          | 0          | 0          | 0          | 0          | 0          | 1          | 0          | 0          | 0          |
| 21           |      | 1           | 0          | 0          | 0          | 0          | 0          | 0          | 0          | 0          | 0          | 0          | 1          |
| <b>total</b> |      | <b>1903</b> | <b>115</b> | <b>176</b> | <b>176</b> | <b>286</b> | <b>230</b> | <b>180</b> | <b>168</b> | <b>170</b> | <b>172</b> | <b>104</b> | <b>126</b> |

**Footnotes:**

(a) haplotype numbers used only in Tables S8 and S9
