# Supplementary material for: Molecular Phylogeography of a Human Autosomal Skin Color Locus Under Natural Selection
Source: PubMed Central journal article supplement (PMC3815065; doi:10.1534/g3.113.007484), 2013-11-01
Supplement: supp_g3.113.007484_TableS10.pdf [file supp_g3.113.007484_TableS10.pdf]

**Table S10 Description of D region haplotypes**

| haplotype    |      | SNP (a)            |    |    |    |    |    |    |    |    |
|--------------|------|--------------------|----|----|----|----|----|----|----|----|
| number (b)   | name | ancestral<br>state | d1 | d2 | d3 | d4 | d5 | d6 | d7 | d8 |
|              |      |                    | T  | C  | A  | G  | C  | G  | T  | G  |
| 1            | D4   |                    | T  | C  | A  | T  | T  | A  | T  | G  |
| 2            | D3   |                    | T  | C  | A  | T  | T  | G  | T  | G  |
| 12           | D2   |                    | T  | C  | A  | T  | C  | G  | T  | G  |
| 5            | D1   |                    | T  | C  | A  | G  | C  | G  | T  | G  |
| 11           | D5   |                    | T  | C  | G  | G  | C  | G  | T  | A  |
| 10           | D6   |                    | G  | C  | G  | G  | C  | G  | T  | A  |
| 3            | D7   |                    | G  | T  | G  | G  | C  | G  | T  | A  |
| 4            | D8   |                    | G  | T  | G  | G  | C  | G  | C  | G  |
| 9            |      |                    | G  | T  | G  | G  | C  | G  | T  | G  |
| 16           |      |                    | G  | T  | G  | G  | C  | A  | T  | G  |
| 14           |      |                    | G  | C  | G  | G  | C  | G  | T  | G  |
| 19           |      |                    | T  | C  | A  | T  | C  | G  | T  | A  |
| 8            |      |                    | T  | C  | A  | G  | C  | G  | T  | A  |
| 15           |      |                    | G  | C  | G  | G  | C  | G  | C  | G  |
| 22           |      |                    | T  | C  | A  | T  | T  | G  | C  | G  |
| 18           |      |                    | T  | C  | G  | G  | C  | G  | T  | G  |
| 6            |      |                    | T  | C  | A  | G  | C  | G  | C  | G  |
| 21           |      |                    | T  | C  | A  | T  | T  | G  | T  | A  |
| 23           |      |                    | T  | C  | A  | T  | T  | A  | T  | A  |
| 26           |      |                    | T  | C  | A  | G  | T  | A  | T  | G  |
| 17           |      |                    | T  | T  | G  | G  | C  | G  | T  | G  |
| 13           |      |                    | T  | C  | A  | T  | C  | G  | C  | G  |
| 7            |      |                    | T  | C  | A  | G  | C  | A  | T  | G  |
| 24           |      |                    | G  | T  | G  | G  | T  | G  | T  | A  |
| 20           |      |                    | T  | C  | G  | G  | C  | A  | T  | G  |
| 25           |      |                    | T  | C  | A  | T  | T  | A  | C  | G  |
| 27           |      |                    | G  | T  | A  | T  | T  | G  | T  | G  |
| 28           |      |                    | G  | C  | G  | G  | T  | A  | T  | G  |
| 29           |      |                    | G  | T  | A  | T  | T  | A  | T  | G  |
| 30           |      |                    | G  | T  | G  | G  | C  | G  | C  | A  |
| 31           |      |                    | G  | C  | A  | T  | T  | G  | C  | G  |
| 32           |      |                    | T  | T  | G  | G  | C  | G  | C  | G  |
| 33           |      |                    | T  | C  | G  | G  | C  | G  | C  | G  |
| <b>total</b> |      |                    |    |    |    |    |    |    |    |    |

**Footnotes:**

(a) SNPs identified by nickname (Table S2)

(b) Haplotype numbers used only in Tables S10 and S11
