# Supplementary material for: Molecular Phylogeography of a Human Autosomal Skin Color Locus Under Natural Selection
Source: PubMed Central journal article supplement (PMC3815065; doi:10.1534/g3.113.007484), 2013-11-01
Supplement: supp_g3.113.007484_TableS11.pdf [file supp_g3.113.007484_TableS11.pdf]

**Table S11 Population distribution of D region haplotypes**

| haplotype     |      | population  |            |            |            |            |            |            |            |            |            |            |            |
|---------------|------|-------------|------------|------------|------------|------------|------------|------------|------------|------------|------------|------------|------------|
| number<br>(a) | name | total       | CEU        | TSI        | GIH        | MKK        | YRI        | LWK        | CHB        | CHD        | JPT        | MEX        | ASW        |
| 1             | D4   | 1080        | 115        | 173        | 172        | 139        | 47         | 52         | 73         | 90         | 92         | 86         | 41         |
| 2             | D3   | 122         | 0          | 3          | 0          | 23         | 27         | 10         | 15         | 15         | 6          | 11         | 12         |
| 12            | D2   | 25          | 0          | 0          | 0          | 6          | 8          | 9          | 0          | 0          | 0          | 0          | 2          |
| 5             | D1   | 67          | 0          | 0          | 1          | 15         | 20         | 17         | 0          | 0          | 0          | 0          | 14         |
| 11            | D5   | 89          | 0          | 0          | 0          | 7          | 50         | 15         | 0          | 0          | 0          | 0          | 17         |
| 10            | D6   | 59          | 0          | 0          | 0          | 14         | 18         | 19         | 0          | 0          | 0          | 0          | 8          |
| 3             | D7   | 154         | 0          | 0          | 2          | 9          | 5          | 5          | 49         | 41         | 41         | 0          | 2          |
| 4             | D8   | 192         | 0          | 0          | 1          | 32         | 34         | 30         | 23         | 17         | 30         | 7          | 18         |
| 9             |      | 13          | 0          | 0          | 0          | 10         | 1          | 0          | 1          | 1          | 0          | 0          | 0          |
| 16            |      | 13          | 0          | 0          | 0          | 3          | 3          | 4          | 2          | 1          | 0          | 0          | 0          |
| 14            |      | 10          | 0          | 0          | 0          | 3          | 2          | 3          | 0          | 0          | 1          | 0          | 1          |
| 19            |      | 9           | 0          | 0          | 0          | 1          | 3          | 5          | 0          | 0          | 0          | 0          | 0          |
| 8             |      | 8           | 0          | 0          | 0          | 4          | 1          | 3          | 0          | 0          | 0          | 0          | 0          |
| 15            |      | 7           | 0          | 0          | 0          | 2          | 2          | 2          | 0          | 0          | 0          | 0          | 1          |
| 22            |      | 7           | 0          | 0          | 0          | 0          | 5          | 0          | 0          | 1          | 0          | 0          | 1          |
| 18            |      | 7           | 0          | 0          | 0          | 5          | 1          | 0          | 0          | 0          | 0          | 0          | 1          |
| 6             |      | 7           | 0          | 0          | 0          | 5          | 1          | 1          | 0          | 0          | 0          | 0          | 0          |
| 21            |      | 5           | 0          | 0          | 0          | 0          | 1          | 2          | 0          | 0          | 0          | 0          | 2          |
| 23            |      | 5           | 0          | 0          | 0          | 0          | 1          | 2          | 1          | 0          | 0          | 0          | 1          |
| 26            |      | 4           | 0          | 0          | 0          | 0          | 0          | 0          | 1          | 2          | 1          | 0          | 0          |
| 17            |      | 4           | 0          | 0          | 0          | 4          | 0          | 0          | 0          | 0          | 0          | 0          | 0          |
| 13            |      | 3           | 0          | 0          | 0          | 1          | 0          | 0          | 1          | 0          | 0          | 0          | 1          |
| 7             |      | 2           | 0          | 0          | 0          | 2          | 0          | 0          | 0          | 0          | 0          | 0          | 0          |
| 24            |      | 2           | 0          | 0          | 0          | 0          | 0          | 1          | 0          | 0          | 0          | 0          | 1          |
| 20            |      | 1           | 0          | 0          | 0          | 1          | 0          | 0          | 0          | 0          | 0          | 0          | 0          |
| 25            |      | 1           | 0          | 0          | 0          | 0          | 0          | 0          | 1          | 0          | 0          | 0          | 0          |
| 27            |      | 1           | 0          | 0          | 0          | 0          | 0          | 0          | 1          | 0          | 0          | 0          | 0          |
| 28            |      | 1           | 0          | 0          | 0          | 0          | 0          | 0          | 0          | 1          | 0          | 0          | 0          |
| 29            |      | 1           | 0          | 0          | 0          | 0          | 0          | 0          | 0          | 1          | 0          | 0          | 0          |
| 30            |      | 1           | 0          | 0          | 0          | 0          | 0          | 0          | 0          | 0          | 1          | 0          | 0          |
| 31            |      | 1           | 0          | 0          | 0          | 0          | 0          | 0          | 0          | 0          | 0          | 0          | 1          |
| 32            |      | 1           | 0          | 0          | 0          | 0          | 0          | 0          | 0          | 0          | 0          | 0          | 1          |
| 33            |      | 1           | 0          | 0          | 0          | 0          | 0          | 0          | 0          | 0          | 0          | 0          | 1          |
| <b>total</b>  |      | <b>1903</b> | <b>115</b> | <b>176</b> | <b>176</b> | <b>286</b> | <b>230</b> | <b>180</b> | <b>168</b> | <b>170</b> | <b>172</b> | <b>104</b> | <b>126</b> |

**Footnotes:**

(a) haplotype numbers used only in Tables S10 and S11
