# Supplementary material for: Molecular Phylogeography of a Human Autosomal Skin Color Locus Under Natural Selection
Source: PubMed Central journal article supplement (PMC3815065; doi:10.1534/g3.113.007484), 2013-11-01
Supplement: supp_g3.113.007484_TableS12.pdf [file supp_g3.113.007484_TableS12.pdf]

**Table S12 Description of A region haplotypes**

| haplotype    |      | SNP (a)            |    |    |    |    |    |    |    |    |    |     |     |
|--------------|------|--------------------|----|----|----|----|----|----|----|----|----|-----|-----|
| number (b)   | name | ancestral<br>state | a1 | a2 | a3 | a4 | a5 | a6 | a7 | a8 | a9 | a10 | a11 |
|              |      |                    | C  | G  | A  | A  | C  | G  | C  | A  | T  | G   | T   |
| 1            | A1   |                    | C  | A  | C  | G  | C  | T  | A  | A  | T  | G   | T   |
| 2            | A5   |                    | C  | G  | A  | A  | T  | T  | C  | A  | T  | A   | T   |
| 3            | A3   |                    | C  | G  | A  | A  | T  | T  | A  | A  | T  | G   | T   |
| 4            |      |                    | C  | A  | C  | G  | T  | T  | A  | A  | T  | G   | T   |
| 5            |      |                    | T  | G  | A  | A  | T  | G  | C  | C  | T  | G   | T   |
| 6            |      |                    | C  | G  | A  | A  | T  | T  | C  | A  | C  | A   | C   |
| 7            | A9   |                    | C  | G  | A  | A  | C  | G  | C  | A  | T  | G   | T   |
| 8            | A8   |                    | T  | G  | A  | A  | T  | G  | C  | C  | C  | G   | C   |
| 9            |      |                    | T  | G  | A  | A  | T  | T  | A  | A  | T  | G   | T   |
| 10           | A4   |                    | C  | G  | A  | A  | T  | T  | C  | A  | T  | G   | T   |
| 11           |      |                    | C  | G  | A  | A  | C  | G  | C  | A  | T  | A   | T   |
| 12           |      |                    | T  | G  | A  | A  | T  | G  | A  | A  | T  | G   | T   |
| 13           |      |                    | C  | A  | C  | G  | C  | T  | C  | A  | T  | A   | T   |
| 14           |      |                    | C  | G  | A  | A  | T  | G  | C  | A  | T  | A   | T   |
| 15           | A6   |                    | C  | G  | A  | A  | T  | T  | C  | C  | T  | G   | T   |
| 16           | A7   |                    | C  | G  | A  | A  | T  | G  | C  | A  | T  | G   | T   |
| 17           |      |                    | C  | G  | C  | G  | C  | T  | C  | A  | T  | G   | T   |
| 18           |      |                    | C  | G  | A  | A  | T  | T  | C  | C  | C  | G   | C   |
| 19           |      |                    | C  | G  | C  | G  | C  | T  | C  | A  | T  | A   | T   |
| 20           | A2   |                    | C  | G  | C  | G  | C  | T  | A  | A  | T  | G   | T   |
| 21           |      |                    | C  | A  | A  | A  | C  | G  | C  | A  | T  | G   | T   |
| 22           |      |                    | C  | A  | C  | G  | C  | T  | A  | A  | T  | A   | T   |
| 23           |      |                    | C  | G  | A  | A  | T  | T  | A  | A  | T  | A   | T   |
| 24           |      |                    | C  | G  | A  | G  | C  | G  | C  | A  | T  | G   | T   |
| 25           |      |                    | C  | A  | A  | A  | T  | G  | C  | A  | T  | G   | T   |
| 26           |      |                    | C  | A  | A  | A  | T  | T  | A  | A  | T  | G   | T   |
| 27           |      |                    | C  | G  | A  | G  | C  | T  | C  | A  | T  | G   | T   |
| 28           |      |                    | C  | A  | C  | G  | C  | T  | A  | A  | T  | G   | C   |
| 29           |      |                    | C  | A  | C  | A  | C  | T  | A  | A  | T  | G   | T   |
| 30           |      |                    | C  | A  | A  | A  | T  | T  | A  | A  | T  | A   | T   |
| 31           |      |                    | T  | A  | A  | A  | T  | G  | C  | C  | C  | G   | C   |
| 32           |      |                    | T  | G  | A  | A  | T  | G  | C  | A  | T  | G   | C   |
| 33           |      |                    | C  | G  | A  | A  | T  | T  | C  | C  | C  | G   | T   |
| 34           |      |                    | C  | G  | A  | A  | T  | T  | C  | C  | T  | A   | T   |
| <b>total</b> |      |                    |    |    |    |    |    |    |    |    |    |     |     |

**Footnotes:**

(a) SNPs identified by nickname (Table S2)

(b) Haplotype numbers used only in Tables S12 and S13
