# Supplementary material for: Molecular Phylogeography of a Human Autosomal Skin Color Locus Under Natural Selection
Source: PubMed Central journal article supplement (PMC3815065; doi:10.1534/g3.113.007484), 2013-11-01
Supplement: supp_g3.113.007484_TableS13.pdf [file supp_g3.113.007484_TableS13.pdf]

**Table S13 Population distribution of A region haplotypes**

| haplotype     |      | population  |            |            |            |            |            |            |            |            |            |            |            |
|---------------|------|-------------|------------|------------|------------|------------|------------|------------|------------|------------|------------|------------|------------|
| number<br>(a) | name | total       | CEU        | TSI        | GIH        | MKK        | YRI        | LWK        | CHB        | CHD        | JPT        | MEX        | ASW        |
| 1             | A1   | 660         | 73         | 85         | 93         | 40         | 41         | 22         | 74         | 77         | 79         | 39         | 37         |
| 2             | A5   | 597         | 41         | 83         | 64         | 158        | 57         | 61         | 28         | 26         | 11         | 38         | 30         |
| 3             | A3   | 116         | 1          | 3          | 10         | 3          | 0          | 1          | 33         | 26         | 37         | 2          | 0          |
| 4             |      | 3           | 0          | 2          | 0          | 0          | 0          | 0          | 0          | 0          | 0          | 1          | 0          |
| 5             |      | 1           | 0          | 1          | 0          | 0          | 0          | 0          | 0          | 0          | 0          | 0          | 0          |
| 6             |      | 1           | 0          | 1          | 0          | 0          | 0          | 0          | 0          | 0          | 0          | 0          | 0          |
| 7             | A9   | 225         | 0          | 1          | 0          | 35         | 86         | 61         | 0          | 0          | 0          | 1          | 41         |
| 8             | A8   | 128         | 0          | 0          | 5          | 2          | 2          | 4          | 29         | 36         | 37         | 13         | 0          |
| 9             |      | 1           | 0          | 0          | 1          | 0          | 0          | 0          | 0          | 0          | 0          | 0          | 0          |
| 10            | A4   | 25          | 0          | 0          | 1          | 10         | 4          | 7          | 2          | 0          | 0          | 0          | 1          |
| 11            |      | 6           | 0          | 0          | 1          | 1          | 2          | 2          | 0          | 0          | 0          | 0          | 0          |
| 12            |      | 2           | 0          | 0          | 1          | 0          | 0          | 0          | 0          | 1          | 0          | 0          | 0          |
| 13            |      | 17          | 0          | 0          | 0          | 16         | 0          | 1          | 0          | 0          | 0          | 0          | 0          |
| 14            |      | 2           | 0          | 0          | 0          | 2          | 0          | 0          | 0          | 0          | 0          | 0          | 0          |
| 15            | A6   | 23          | 0          | 0          | 0          | 6          | 7          | 5          | 0          | 0          | 0          | 0          | 5          |
| 16            | A7   | 53          | 0          | 0          | 0          | 9          | 27         | 9          | 0          | 0          | 0          | 0          | 8          |
| 17            |      | 1           | 0          | 0          | 0          | 1          | 0          | 0          | 0          | 0          | 0          | 0          | 0          |
| 18            |      | 3           | 0          | 0          | 0          | 2          | 0          | 1          | 0          | 0          | 0          | 0          | 0          |
| 19            |      | 1           | 0          | 0          | 0          | 1          | 0          | 0          | 0          | 0          | 0          | 0          | 0          |
| 20            | A2   | 22          | 0          | 0          | 0          | 0          | 2          | 3          | 0          | 1          | 6          | 9          | 1          |
| 21            |      | 1           | 0          | 0          | 0          | 0          | 1          | 0          | 0          | 0          | 0          | 0          | 0          |
| 22            |      | 2           | 0          | 0          | 0          | 0          | 1          | 0          | 1          | 0          | 0          | 0          | 0          |
| 23            |      | 1           | 0          | 0          | 0          | 0          | 0          | 1          | 0          | 0          | 0          | 0          | 0          |
| 24            |      | 1           | 0          | 0          | 0          | 0          | 0          | 1          | 0          | 0          | 0          | 0          | 0          |
| 25            |      | 1           | 0          | 0          | 0          | 0          | 0          | 1          | 0          | 0          | 0          | 0          | 0          |
| 26            |      | 1           | 0          | 0          | 0          | 0          | 0          | 0          | 1          | 0          | 0          | 0          | 0          |
| 27            |      | 1           | 0          | 0          | 0          | 0          | 0          | 0          | 0          | 1          | 0          | 0          | 0          |
| 28            |      | 2           | 0          | 0          | 0          | 0          | 0          | 0          | 0          | 2          | 0          | 0          | 0          |
| 29            |      | 1           | 0          | 0          | 0          | 0          | 0          | 0          | 0          | 0          | 1          | 0          | 0          |
| 30            |      | 1           | 0          | 0          | 0          | 0          | 0          | 0          | 0          | 0          | 1          | 0          | 0          |
| 31            |      | 1           | 0          | 0          | 0          | 0          | 0          | 0          | 0          | 0          | 0          | 1          | 0          |
| 32            |      | 1           | 0          | 0          | 0          | 0          | 0          | 0          | 0          | 0          | 0          | 0          | 1          |
| 33            |      | 1           | 0          | 0          | 0          | 0          | 0          | 0          | 0          | 0          | 0          | 0          | 1          |
| 34            |      | 1           | 0          | 0          | 0          | 0          | 0          | 0          | 0          | 0          | 0          | 0          | 1          |
| <b>total</b>  |      | <b>1903</b> | <b>115</b> | <b>176</b> | <b>176</b> | <b>286</b> | <b>230</b> | <b>180</b> | <b>168</b> | <b>170</b> | <b>172</b> | <b>104</b> | <b>126</b> |

**Footnotes:**

(a) haplotype numbers used only in Tables S12 and S13
