# Supplementary material for: Molecular Phylogeography of a Human Autosomal Skin Color Locus Under Natural Selection
Source: PubMed Central journal article supplement (PMC3815065; doi:10.1534/g3.113.007484), 2013-11-01
Supplement: supp_g3.113.007484_TableS14.pdf [file supp_g3.113.007484_TableS14.pdf]

Table S14 Haplotype combinations in HGDP and other samples

| population |                                | haplotype combination |            |                |              |             |
|------------|--------------------------------|-----------------------|------------|----------------|--------------|-------------|
| HGDP code  | name                           | A1+B6+C11             | A5+B6+C11  | A.other+B6+C11 | B6+C11 total | C11 total   |
| 20         | Orcadian                       | 16                    | 11         | 0              | 27           | 30          |
| 21         | Adygei                         | 21                    | 11         | 0              | 32           | 34          |
| 22         | Russian                        | 26                    | 20         | 0              | 46           | 47          |
| 24         | Basque                         | 26                    | 17         | 1              | 44           | 48          |
| 25         | French                         | 19                    | 31         | 1              | 51           | 55          |
| 27         | Italian                        | 15                    | 6          | 2              | 23           | 24          |
| 28         | Sardinian                      | 17                    | 33         | 1              | 51           | 55          |
| 29         | Tuscan                         | 8                     | 5          | 1              | 14           | 16          |
| 34         | Mozabite                       | 20                    | 24         | 0              | 44           | 50          |
| 36         | Bedouin                        | 33                    | 49         | 2              | 84           | 88          |
| 37         | Druze                          | 24                    | 48         | 6              | 78           | 84          |
| 38         | Palestinian                    | 30                    | 50         | 4              | 84           | 90          |
| 50         | Balochi                        | 18                    | 19         | 1              | 38           | 45          |
| 51         | Brahui                         | 24                    | 22         | 1              | 47           | 49          |
| 52         | Burusho                        | 23                    | 26         | 0              | 49           | 49          |
| 54         | Hazara                         | 23                    | 6          | 0              | 29           | 29          |
| 56         | Kalash                         | 40                    | 6          | 0              | 46           | 46          |
| 57         | Makrani                        | 23                    | 17         | 0              | 40           | 43          |
| 58         | Pathan (Pashtun)               | 18                    | 21         | 1              | 40           | 41          |
| 59         | Sindhi                         | 20                    | 17         | 1              | 38           | 39          |
| 86         | Maya                           | 1                     | 3          | 0              | 4            | 4           |
| 430        | BantuSouthAfrica               | 1                     | 0          | 0              | 1            | 1           |
| 464        | Mandenka                       | 1                     | 3          | 0              | 4            | 5           |
| 465        | Yoruba                         | 0                     | 1          | 0              | 1            | 1           |
| 494        | San                            | 1                     | 0          | 0              | 1            | 1           |
| 601        | Han (a)                        | 1                     | 0          | 1              | 2            | 3           |
| 606        | Dai (a)                        | 0                     | 1          | 0              | 1            | 1           |
| 607        | Daur (a)                       | 2                     | 0          | 0              | 2            | 2           |
| 613        | Oroqen (a)                     | 3                     | 0          | 0              | 3            | 3           |
| 617        | Tu (a)                         | 1                     | 0          | 0              | 1            | 1           |
| 618        | Xibo (a)                       | 3                     | 0          | 0              | 3            | 4           |
| 619        | Yi (a)                         | 1                     | 0          | 0              | 1            | 1           |
| 622        | Mongola (a)                    | 3                     | 0          | 0              | 3            | 3           |
| 629        | Uygur                          | 3                     | 5          | 0              | 8            | 9           |
| 677        | Cambodian (a)                  | 0                     | 1          | 0              | 1            | 1           |
| 699        | Yakut                          | 10                    | 2          | 0              | 12           | 13          |
|            | Yemen                          | 6                     | 5          | 0              | 11           | 13          |
|            | Egypt                          | 10                    | 8          | 2              | 20           | 21          |
|            | Ethiopian Jews                 | 3                     | 6          | 0              | 9            | 12          |
|            | Ethiopian                      | 7                     | 11         | 0              | 18           | 21          |
|            | Saudi                          | 21                    | 15         | 1              | 37           | 37          |
|            | Morocco                        | 5                     | 10         | 1              | 16           | 18          |
|            | South Indian (mixed)           | 5                     | 9          | 0              | 14           | 15          |
|            | <b>East Asian subtotal (a)</b> | <b>14</b>             | <b>2</b>   | <b>1</b>       | <b>18</b>    | <b>20</b>   |
|            | <b>total</b>                   | <b>532</b>            | <b>519</b> | <b>27</b>      | <b>1078</b>  | <b>1152</b> |
