# Supplementary material for: Molecular Phylogeography of a Human Autosomal Skin Color Locus Under Natural Selection
Source: PubMed Central journal article supplement (PMC3815065; doi:10.1534/g3.113.007484), 2013-11-01
Supplement: supp_g3.113.007484_TableS15.pdf [file supp_g3.113.007484_TableS15.pdf]

**Table S15** Distribution of nucleotide substitutions in C and D regions

| nucleotide change | fraction of total    |                  |
|-------------------|----------------------|------------------|
|                   | hu:chimp<br>(n=1227) | C11D4<br>(n=269) |
| A:G or G:A        | 0.306                | 0.342            |
| T:C or C:T        | 0.355                | 0.346            |
| A:T or T:A        | 0.077                | 0.056            |
| C:G or G:C        | 0.082                | 0.063            |
| A:C or C:A        | 0.103                | 0.097            |
| T:G or G:T        | 0.077                | 0.097            |
